# Supplementary material for: Dissecting Bread Wheat Heterosis through the Integration of Agronomic and Physiological Traits
Source: MDPI journal article supplement (doi:10.3390/biology10090907), 2021-09-13
Supplement: s1 [file s1]

## Supplementary Data

**Table S2: correspondence between the line names of the wheat genotypes and the code names.**

| Line name    | Code name |
|--------------|-----------|
| TW16TX020472 | FEM01     |
| TW16TX020386 | FEM02     |
| H16FR15042   | FEM03     |
| TW16TX020251 | FEM04     |
| TW16TX030811 | FEM05     |
| H13FR14273   | FEM06     |
| H16FR14997   | FEM07     |
| TW16TX020212 | FEM08     |
| H1144033     | FEM09     |
| TW16TX020444 | FEM10     |
| H15FR14199   | FEM11     |
| H15FR13965   | FEM12     |
| TW16TX020166 | FEM13     |
| TW16TX020391 | FEM14     |
| H16FR14826   | FEM15     |
| TW16TX030804 | FEM16     |
| H15FR14855   | FEM17     |
| H13FR14654   | FEM18     |
| TW16TX020287 | FEM19     |
| H15FR15131   | FEM20     |
| TW16TX020338 | FEM21     |
| TW16TX020148 | FEM22     |
| H1111183     | FEM23     |
| TW16TX020402 | FEM24     |
| H16FR14992   | FEM25     |
| H16FR15036   | FEM26     |
| SYN 10739    | FEM27     |
| H06334       | FEM28     |
| TW16TX030806 | FEM29     |
| TW16TX020500 | FEM30     |
| TW16TX020254 | FEM31     |
| TW16TX030810 | FEM32     |
| TW16TX020197 | FEM33     |
| TW16TX020475 | FEM34     |

|              |       |
|--------------|-------|
| H16FR15187   | FEM35 |
| H16FR14978   | FEM36 |
| TW16TX020372 | FEM37 |
| SY 116421    | FEM38 |
| H16FR15024   | FEM39 |
| TW16TX020505 | FEM40 |
| TW16TX030801 | FEM41 |
| H13FR14276   | FEM42 |
| TW16TX020503 | FEM43 |
| TW16TX023062 | FEM44 |
| TW16TX020459 | FEM45 |
| TW16TX023061 | FEM46 |
| H10611       | FEM47 |
| TW16TX020106 | FEM48 |
| H1111265     | FEM49 |
| TW16TX020191 | FEM50 |
| TW16TX020451 | FEM51 |
| H15FR14285   | FEM52 |
| TW16TX020421 | FEM53 |
| TW16TX020510 | FEM54 |
| TW16TX020454 | FEM55 |
| TW16TX020375 | FEM56 |
| TW16TX023069 | FEM57 |
| H16FR15162   | FEM58 |
| TW16TX020163 | FEM59 |
| H16FR15015   | FEM60 |
| H14FR13664   | FEM61 |
| TW16TX030809 | FEM62 |
| TW16TX020501 | FEM63 |
| H16FR14980   | FEM64 |
| TW16TX030812 | FEM65 |
| H15FR15113   | FEM66 |
| TW16TX020008 | FEM67 |
| H15FR14333   | FEM68 |
| TW16TX020441 | FEM69 |
| TW16TX020310 | FEM70 |
| TW16TX030803 | FEM71 |
| TW16TX020146 | FEM72 |
| H16FR15007   | FEM73 |
| H15FR15114   | FEM74 |
| TW16TX020430 | FEM75 |
| H16FR15017   | FEM76 |
| TW16TX020119 | FEM77 |
| H16FR14971   | FEM78 |

|                 |       |
|-----------------|-------|
| ROBIGUS         | FEM79 |
| TW16TX020404    | FEM80 |
| TW16TX020492    | FEM81 |
| TW16TX020493    | FEM82 |
| H1111142        | FEM83 |
| TW16TX020126    | FEM84 |
| H16FR15038      | FEM85 |
| TW16TX020423    | FEM86 |
| TW16TX020471    | FEM87 |
| TW16TX021726    | FEM88 |
| H15FR15060      | FEM89 |
| TW16TX023060    | FEM91 |
| H16FR14999      | FEM92 |
| TW16TX020424    | FEM93 |
| RTW17TX020100   | MA01  |
| RTW17TX020234   | MA02  |
| RTW17TX020253   | MA03  |
| RTW16TX010075   | MA04  |
| RTW16TX010251-1 | MA05  |
| RTW17TX020066   | MA06  |
| RTW17TX020152   | MA07  |
| RTW16TX020050   | MA08  |
| RTW16TX030004-1 | MA09  |
| RTW16TX010029   | MA10  |
| R16FR14053      | MA11  |
| RTW17TX020357   | MA12  |
| RTW16TX010249-1 | MA13  |
| RTW16TX010116   | MA14  |
| RTW16TA003043-4 | MA15  |
| R16FR14021      | MA16  |
| RTW16TX010010-1 | MA17  |
| RTW17TX020009   | MA18  |
| RTW17TX020047   | MA19  |
| R16FR14050      | MA20  |
| RTW16TX010030   | MA21  |
| R16FR14045      | MA22  |
| RTW17TX020077   | MA23  |
| RTW16TX010093   | MA24  |
| RTW16TX010036-2 | MA25  |
| RTW16TX010035   | MA26  |
| RTW16TX010043   | MA27  |
| R16FR14130      | MA28  |
| RTW16TX010244-2 | MA29  |
| RTW17TX020121   | MA30  |

|                 |      |
|-----------------|------|
| RTW17TX020011   | MA31 |
| RTW17TX020270   | MA32 |
| RTW16TX010044   | MA33 |
| RTW16TX010260   | MA34 |
| RTW16TX030054   | MA35 |
| RTW16TX010033   | MA36 |
| RTW16TX010026   | MA37 |
| R16FR14032      | MA38 |
| RTW16TA003042   | MA39 |
| RTW16TX010095   | MA40 |
| RTW16TX010054-2 | MA41 |
| RTW17TX020209   | MA42 |
| RTW16TX010061-1 | MA43 |

**Table S3: Incomplete factorial bread wheat F1 hybrid mating design:** Females (FEM; in blue and red) in rows and males (MA; in orange and green) in columns. “X” indicates hybrids that have been tested in this study. Colors corresponds to genetic groups identified in Figure 2.

|       | MA24 | MA05 | MA04 | MA25 | MA13 | MA22 | MA28 | MA18 | MA30 | MA38 | MA03 | MA37 | MA21 | MA29 | MA08 | MA32 | Total |
|-------|------|------|------|------|------|------|------|------|------|------|------|------|------|------|------|------|-------|
| FEM09 | X    |      | X    |      | X    |      | X    |      | X    |      |      | X    | X    | X    |      |      | 8     |
| FEM85 |      |      |      | X    |      | X    |      |      |      | X    |      |      |      |      |      |      | 3     |
| FEM33 |      |      |      | X    |      | X    |      |      |      |      |      |      |      |      |      |      | 2     |
| FEM73 | X    | X    |      |      |      |      | X    |      |      |      | X    | X    | X    |      | X    | X    | 8     |
| FEM76 |      |      | X    |      | X    | X    |      |      |      |      |      | X    | X    |      | X    |      | 6     |
| FEM20 | X    | X    | X    |      | X    |      | X    | X    |      |      |      | X    |      | X    |      |      | 8     |
| FEM44 |      |      |      | X    |      | X    |      |      |      | X    |      |      |      |      |      |      | 3     |
| FEM28 | X    |      |      |      |      |      |      | X    | X    | X    | X    | X    | X    |      | X    |      | 7     |
| FEM02 |      |      |      | X    |      | X    |      |      |      |      |      |      |      |      |      |      | 2     |
| FEM05 |      |      |      | X    |      | X    |      | X    |      | X    |      |      |      |      |      |      | 4     |
| FEM16 |      |      |      | X    |      | X    |      |      |      | X    |      |      |      |      |      |      | 3     |
| FEM18 | X    |      | X    |      | X    | X    |      | X    |      |      | X    | X    | X    |      | X    |      | 9     |
| FEM24 |      |      |      | X    |      | X    |      |      |      |      |      |      |      |      |      |      | 2     |
| FEM38 |      |      |      | X    |      | X    |      |      |      | X    |      |      |      | X    |      |      | 4     |
| FEM45 |      |      |      | X    |      | X    |      |      | X    | X    |      |      |      |      |      |      | 4     |
| FEM47 |      | X    |      |      | X    |      | X    |      | X    |      |      |      |      |      |      | X    | 5     |
| FEM58 |      |      |      |      | X    |      |      |      | X    | X    |      | X    |      | X    | X    | X    | 7     |
| FEM67 |      |      |      | X    |      | X    |      |      |      | X    |      |      |      |      |      |      | 3     |
| FEM70 |      |      |      | X    |      | X    |      |      |      | X    |      |      |      |      |      |      | 3     |
| Total | 5    | 3    | 4    | 11   | 6    | 13   | 4    | 4    | 5    | 10   | 3    | 7    | 5    | 4    | 5    | 3    | 92    |

**Table S4: Description of phenotypic traits**

| Trait                        | Unit                 | Abbreviation | Description                                                                                                    |
|------------------------------|----------------------|--------------|----------------------------------------------------------------------------------------------------------------|
| Heading date                 | days                 | HD           | 50% of the ears emerged at 100%                                                                                |
| Plant height                 | cm                   | HT           | measured from the ground until the top of the canopy                                                           |
| Grain protein content        | %                    | GPC          | protein concentration estimated with a NIR XDS analyser (FOSS; Denmark).                                       |
| Seed area                    | mm <sup>2</sup>      | SEEDA        | mean of the surface for 100 seeds estimated with a MARViN system                                               |
| Seed length                  | mm                   | SEEDL        | mean of the length for 100 seeds estimated with a MARViN system                                                |
| Seed width                   | mm                   | SEEDW        | mean of the width for 100 seeds estimated with a MARViN system                                                 |
| Specific weight              | kg/hL                | SW           | weight of 1000 grains divided by its volume                                                                    |
| Thousand kernel weight       | g                    | TKW          | weight of 1000 grains normalized at 0% of humidity                                                             |
| Grain yield                  | t/ha                 | YLD          | weight of grains harvested normalized at 0% of humidity                                                        |
| Grain protein deviation      | -                    | GPD          | residuals from the regression of grain protein content on grain yield                                          |
| Grain protein yield          | t/ha                 | GPY          | estimated by multiplying grain yield by grain protein content                                                  |
| Grains per square meter      | grain/m <sup>2</sup> | GPSM         | estimated by dividing grain yield by thousand kernel weight                                                    |
| NDVI MAX                     | -                    | Nmax         | maximum of measured NDVI                                                                                       |
| Area of the growing phase    | -                    | GPA          | integration from sowing to Nmax of the linear model of NDVI as a function of thermal time                      |
| Area of the flowering phase  | -                    | FPA          | integration from Nmax to the beginning of senescence of the linear model of NDVI as a function of thermal time |
| Area of the senescence phase | -                    | SPA          | integration of the logistic model from primitive H(x=0) of Equation 3 to end of senescence (TFN1)              |
| Area of the declining phase  | -                    | DPA          | sum of area of the flowering phase and area of the senescence phase                                            |
| Total NDVI area              | -                    | TA           | sum of area of the growing phase, area of the flowering phase and area of the senescence phase                 |
| TFN90                        | °C days              | TFN90        | thermal time when 90% of the NDVI amplitude remains                                                            |
| TFN50                        | °C days              | TFN50        | thermal time when 50% of the NDVI amplitude remains                                                            |
| TFN10                        | °C days              | TFN10        | thermal time when 10% of the NDVI amplitude remains                                                            |
| TFN1                         | °C days              | TFN1         | thermal time when 1% of the NDVI amplitude remains                                                             |

**Table S5: Descriptive statistics of phenotypic traits in Moinville-la-Jeulin.** Average, minimal and maximal values as well as heritabilities ( $H^2$ ), genetic variances ( $V_\alpha$ ) and residual errors ( $V_\epsilon$ ) were calculated for all phenotypic traits.

| Trait | Unit                  | Mean    | Min     | Max     | $H^2$ | $V_\alpha$ | $V_\epsilon$ |
|-------|-----------------------|---------|---------|---------|-------|------------|--------------|
| YLD   | t/ha                  | 7.0     | 5.3     | 8.4     | 0.57  | 1.7E-01    | 1.5E-01      |
| GPC   | %                     | 12.1    | 10.2    | 14.6    | 0.66  | 2.4E-01    | 1.5E-01      |
| SW    | kg/hL                 | 83.9    | 79.7    | 87.3    | 0.78  | 1.5E+00    | 5.2E-01      |
| HD    | days                  | 127.5   | 121.0   | 141.0   | 0.98  | 1.5E+01    | 4.2E-01      |
| HT    | cm                    | 91.1    | 67.0    | 116.0   | 0.91  | 5.1E+01    | 6.2E+00      |
| SEEDA | mm <sup>2</sup>       | 16.2    | 12.9    | 18.6    | 0.82  | 7.2E-01    | 1.9E-01      |
| SEEDL | mm                    | 6.3     | 5.5     | 6.9     | 0.73  | 8.3E-03    | 3.6E-03      |
| SEEDW | mm                    | 3.6     | 3.2     | 3.8     | 0.93  | 4.5E-02    | 4.3E-03      |
| TKW   | g                     | 42.4    | 32.1    | 50.1    | 0.92  | 8.7E+00    | 8.9E-01      |
| GPY   | t/ha                  | 0.8     | 0.7     | 1.0     | 0.54  | 1.5E-03    | 1.5E-03      |
| GPSM  | grains/m <sup>2</sup> | 16539.5 | 12672.0 | 20448.9 | 0.56  | 1.2E+06    | 1.1E+06      |
| Nmax  | -                     | 0.9     | 0.7     | 0.9     | 0.78  | 8.4E-04    | 2.9E-04      |
| GPA   | -                     | 810.0   | 701.5   | 893.4   | 0.66  | 1.1E+03    | 6.7E+02      |
| FPA   | -                     | 205.3   | 70.4    | 349.8   | 0.87  | 2.5E+03    | 4.6E+02      |
| SPA   | -                     | 260.7   | 204.5   | 316.9   | 0.87  | 4.6E+02    | 8.0E+01      |
| DPA   | -                     | 466.0   | 347.4   | 570.7   | 0.71  | 1.0E+03    | 5.0E+02      |
| TA    | -                     | 1276.0  | 1118.3  | 1463.9  | 0.64  | 2.2E+03    | 1.5E+03      |
| TFN90 | °C days               | 584.7   | 427.1   | 694.1   | 0.43  | 7.9E+02    | 1.3E+03      |
| TFN50 | °C days               | 665.1   | 547.2   | 736.3   | 0.87  | 1.6E+03    | 2.7E+02      |
| TFN10 | °C days               | 745.6   | 621.4   | 832.3   | 0.90  | 2.0E+03    | 2.7E+02      |
| TFN1  | °C days               | 833.3   | 678.2   | 946.7   | 0.59  | 1.9E+03    | 1.6E+03      |

YLD, grain yield; GPC, grain protein content; SW, specific weight; HD, heading date; HT, plant height; SEEDA, seed area; SEEDL, seed length; SEEDW, seed width; TKW, thousand kernel weight; GPY, grain protein yield; GPSM, grains per square meter; Nmax, maximum measured NDVI; GPA, area of the growing phase; FPA, area of the flowering phase; SPA, area of the senescence phase; DPA, area of the declining phase; TA, total NDVI area; TFN90, 90% of the NDVI amplitude remains; TFN50, 50% of the NDVI amplitude remains; TFN10, 10% of the NDVI amplitude remains; TFN1, 1% of the NDVI amplitude remains

**Table S6: Descriptive statistics of phenotypic traits in Arvillers.** Average, minimal and maximal values as well as heritabilities ( $H^2$ ), genetic variances ( $V_\alpha$ ) and residual errors ( $V_\epsilon$ ) were calculated for all phenotypic traits.

| Trait | Unit                  | Mean    | Min     | Max     | $H^2$ | $V_\alpha$ | $V_\epsilon$ |
|-------|-----------------------|---------|---------|---------|-------|------------|--------------|
| YLD   | t/ha                  | 10.4    | 8.0     | 12.2    | 0.66  | 2.9E-01    | 1.8E-01      |
| GPC   | %                     | 12.3    | 11.3    | 13.6    | 0.78  | 1.7E-01    | 5.6E-02      |
| SW    | kg/hL                 | 80.2    | 76.3    | 82.8    | 0.94  | 1.8E+00    | 1.3E-01      |
| HD    | days                  | 138.7   | 130.0   | 151.0   | 0.97  | 1.5E+01    | 6.1E-01      |
| HT    | cm                    | 98.6    | 74.0    | 123.0   | 0.84  | 6.0E+01    | 1.4E+01      |
| SEEDA | mm <sup>2</sup>       | 16.0    | 12.7    | 18.1    | 0.91  | 8.6E-01    | 9.5E-02      |
| SEEDL | mm                    | 6.4     | 5.6     | 7.0     | 0.88  | 1.3E-02    | 2.1E-03      |
| SEEDW | mm                    | 3.5     | 3.1     | 3.8     | 0.88  | 5.0E-02    | 7.9E-03      |
| TKW   | g                     | 40.0    | 30.2    | 46.5    | 0.97  | 2.1E+01    | 8.2E-01      |
| GPY   | t/ha                  | 1.3     | 1.0     | 1.5     | 0.54  | 3.4E-03    | 3.4E-03      |
| GPSM  | grains/m <sup>2</sup> | 25800.3 | 21076.4 | 30971.4 | 0.77  | 2.7E+06    | 9.9E+05      |
| Nmax  | -                     | 0.9     | 0.8     | 1.0     | 0.68  | 2.5E-04    | 1.4E-04      |
| GPA   | -                     | 843.4   | 730.5   | 908.4   | 0.84  | 9.5E+02    | 2.1E+02      |
| FPA   | -                     | 420.7   | 280.4   | 624.2   | 0.78  | 2.5E+03    | 8.5E+02      |
| SPA   | -                     | 280.7   | 176.4   | 338.7   | 0.50  | 4.0E+02    | 4.6E+02      |
| DPA   | -                     | 701.4   | 559.8   | 801.7   | 0.89  | 1.7E+03    | 2.5E+02      |
| TA    | -                     | 1102.3  | 917.4   | 1216.2  | 0.89  | 2.3E+03    | 3.4E+02      |
| TFN90 | °C days               | 588.6   | 479.9   | 675.3   | 0.61  | 7.1E+02    | 5.3E+02      |
| TFN50 | °C days               | 740.5   | 630.9   | 806.2   | 0.78  | 8.0E+02    | 2.7E+02      |
| TFN10 | °C days               | 892.5   | 755.1   | 1016.7  | 0.54  | 8.5E+02    | 8.7E+02      |
| TFN1  | °C days               | 1058.3  | 869.0   | 1264.5  | 0.35  | 1.1E+03    | 2.4E+03      |

YLD, grain yield; GPC, grain protein content; SW, specific weight; HD, heading date; HT, plant height; SEEDA, seed area; SEEDL, seed length; SEEDW, seed width; TKW, thousand kernel weight; GPY, grain protein yield; GPSM, grains per square meter; Nmax, maximum measured NDVI; GPA, area of the growing phase; FPA, area of the flowering phase; SPA, area of the senescence phase; DPA, area of the declining phase; TA, total NDVI area; TFN90, 90% of the NDVI amplitude remains; TFN50, 50% of the NDVI amplitude remains; TFN10, 10% of the NDVI amplitude remains; TFN1, 1% of the NDVI amplitude remains



**Table S7: Descriptive statistics of phenotypic traits in Pomacle.** Average, minimal and maximal values as well as heritabilities ( $H^2$ ), genetic variances ( $V_\alpha$ ) and residual errors ( $V_\epsilon$ ) were calculated for all phenotypic traits.

| Trait | Unit                  | Mean    | Min     | Max     | $H^2$ | $V_\alpha$ | $V_\epsilon$ |
|-------|-----------------------|---------|---------|---------|-------|------------|--------------|
| YLD   | t/ha                  | 8.2     | 5.7     | 10.0    | 0.80  | 5.0E-01    | 1.5E-01      |
| GPC   | %                     | 11.3    | 10.1    | 13.2    | 0.72  | 1.7E-01    | 7.8E-02      |
| SW    | kg/hL                 | 80.9    | 76.4    | 83.1    | 0.97  | 1.5E+00    | 5.1E-02      |
| HD    | days                  | 131.8   | 124.0   | 145.0   | 0.99  | 1.9E+01    | 2.6E-01      |
| HT    | cm                    | 91.0    | 73.0    | 123.0   | 0.92  | 4.9E+01    | 5.2E+00      |
| SEEDA | mm <sup>2</sup>       | 15.9    | 12.1    | 18.9    | 0.96  | 1.0E+00    | 4.7E-02      |
| SEEDL | mm                    | 6.2     | 5.4     | 7.1     | 0.92  | 1.1E-02    | 1.0E-03      |
| SEEDW | mm                    | 3.5     | 3.1     | 3.9     | 0.98  | 6.1E-02    | 1.2E-03      |
| TKW   | g                     | 41.1    | 30.1    | 47.9    | 0.97  | 8.1E+00    | 3.1E-01      |
| GPY   | t/ha                  | 0.9     | 0.7     | 1.1     | 0.77  | 4.9E-03    | 1.8E-03      |
| GPSM  | grains/m <sup>2</sup> | 19524.6 | 13748.9 | 23391.2 | 0.84  | 3.2E+06    | 7.1E+05      |
| Nmax  | -                     | 0.9     | 0.7     | 0.9     | 0.72  | 8.7E-04    | 4.0E-04      |
| GPA   | -                     | 850.4   | 692.8   | 921.2   | 0.92  | 1.4E+03    | 1.4E+02      |
| FPA   | -                     | 410.0   | 296.5   | 569.3   | 0.79  | 1.2E+03    | 3.8E+02      |
| SPA   | -                     | 313.3   | 222.7   | 412.1   | 0.51  | 3.4E+02    | 4.0E+02      |
| DPA   | -                     | 723.3   | 600.4   | 884.1   | 0.81  | 2.1E+03    | 6.0E+02      |
| TA    | -                     | 1573.7  | 1305.9  | 1764.1  | 0.83  | 4.2E+03    | 1.0E+03      |
| TFN90 | °C days               | 524.7   | 400.1   | 594.1   | 0.69  | 9.4E+02    | 4.9E+02      |
| TFN50 | °C days               | 658.2   | 553.7   | 736.7   | 0.72  | 8.2E+02    | 3.9E+02      |
| TFN10 | °C days               | 791.7   | 669.5   | 901.1   | 0.59  | 8.8E+02    | 7.4E+02      |
| TFN1  | °C days               | 937.4   | 785.7   | 1109.5  | 0.43  | 1.1E+03    | 1.7E+03      |

YLD, grain yield; GPC, grain protein content; SW, specific weight; HD, heading date; HT, plant height; SEEDA, seed area; SEEDL, seed length; SEEDW, seed width; TKW, thousand kernel weight; GPY, grain protein yield; GPSM, grains per square meter; Nmax, maximum measured NDVI; GPA, area of the growing phase; FPA, area of the flowering phase; SPA, area of the senescence phase; DPA, area of the declining phase; TA, total NDVI area; TFN90, 90% of the NDVI amplitude remains; TFN50, 50% of the NDVI amplitude remains; TFN10, 10% of the NDVI amplitude remains; TFN1, 1% of the NDVI amplitude remains

**Table S8: Mid-parent and best-parent heterosis of F<sub>1</sub> hybrids in Moinville-la-Jeulin.** For each trait, are indicated the number of hybrids tested, the average heterosis, the p-value of the Student test between hybrids and parent lines, the minimal and maximal value as well as the heterosis coefficient of variation.

| Trait | Number of hybrids | Mid-parent heterosis |         |         |         |              | Best-parent heterosis |         |         |         |              |
|-------|-------------------|----------------------|---------|---------|---------|--------------|-----------------------|---------|---------|---------|--------------|
|       |                   | Mean (%)             | p-value | Min (%) | Max (%) | $\sigma/\mu$ | Mean (%)              | p-value | Min (%) | Max (%) | $\sigma/\mu$ |
| YLD   | 81                | 4.2                  | 1.2E-05 | -13.0   | 23.6    | 1.9          | -2.7                  | 2.6E-03 | -17.3   | 21.1    | -2.9         |
| GPC   | 81                | -0.6                 | n.s     | -10.6   | 11.7    | -8.7         | -4.1                  | 3.5E-09 | -14.2   | 7.5     | -1.3         |
| SW    | 81                | 0.9                  | 4.9E-09 | -2.2    | 4.1     | 1.4          | -0.3                  | 4.9E-02 | -3.7    | 2.9     | -4.5         |
| HD    | 81                | -2.5                 | 1.2E-27 | -6.0    | 0.8     | -0.5         | -5.3                  | 3.4E-31 | -11.4   | 0.0     | -0.5         |
| HT    | 81                | 8.4                  | 2.9E-23 | -3.8    | 21.1    | 0.6          | 0.9                   | n.s     | -18.1   | 16.5    | 7.9          |
| SEEDA | 81                | 4.2                  | 1.3E-13 | -7.8    | 15.3    | 1.0          | 0.0                   | n.s     | -15.5   | 9.6     | 113.1        |
| SEEDL | 81                | 1.2                  | 6.1E-06 | -3.8    | 7.6     | 1.8          | -1.6                  | 3.7E-06 | -10.0   | 6.3     | -1.8         |
| SEEDW | 81                | 2.8                  | 1.7E-17 | -5.2    | 9.0     | 0.8          | 1.0                   | 7.2E-04 | -6.5    | 6.7     | 2.5          |
| TKW   | 81                | 7.0                  | 1.2E-25 | -9.1    | 15.3    | 0.6          | 1.8                   | 1.2E-02 | -17.7   | 13.7    | 3.5          |
| GPY   | 81                | 3.2                  | 9.6E-04 | -13.4   | 23.2    | 2.6          | -2.8                  | 5.9E-04 | -17.5   | 17.1    | -2.5         |
| GPSM  | 81                | -3.2                 | 7.5E-05 | -23.2   | 15.7    | -2.1         | -8.3                  | 2.0E-17 | -23.7   | 9.1     | -0.8         |
| Nmax  | 81                | 2.1                  | 3.1E-05 | -6.1    | 13.9    | 2.0          | -1.1                  | 1.3E-02 | -10.8   | 12.1    | -3.5         |
| GPA   | 81                | 1.8                  | 7.9E-06 | -8.1    | 14.6    | 1.9          | -1.7                  | 5.4E-04 | -11.7   | 14.3    | -2.5         |
| FPA   | 81                | -1.4                 | n.s     | -48.6   | 150.4   | -19.9        | -18.8                 | 7.7E-09 | -60.6   | 117.8   | -1.4         |
| SPA   | 81                | 3.8                  | 1.1E-07 | -12.2   | 16.7    | 1.5          | -4.3                  | 3.9E-09 | -16.8   | 7.5     | -1.4         |
| DPA   | 81                | 0.3                  | n.s     | -18.5   | 35.5    | 24.9         | -5.6                  | 1.2E-07 | -25.1   | 31.9    | -1.5         |
| TA    | 81                | 1.2                  | 6.9E-03 | -6.4    | 12.5    | 3.2          | -2.7                  | 1.5E-07 | -11.6   | 7.3     | -1.6         |
| TFN90 | 81                | 7.6                  | 2.9E-11 | -13.5   | 33.6    | 1.2          | -0.6                  | n.s     | -21.6   | 18.0    | -15.9        |
| TFN50 | 81                | 6.1                  | 1.3E-19 | -6.6    | 15.3    | 0.7          | -0.7                  | n.s     | -12.6   | 9.6     | -7.4         |
| TFN10 | 81                | 5.1                  | 3.0E-18 | -4.4    | 14.0    | 0.8          | -0.9                  | n.s     | -9.5    | 8.6     | -4.6         |
| TFN1  | 81                | 4.4                  | 1.7E-08 | -13.0   | 19.5    | 1.4          | -1.4                  | 2.5E-02 | -19.0   | 9.7     | -3.9         |

YLD, grain yield; GPC, grain protein content; SW, specific weight; HD, heading date; HT, plant height; SEEDA, seed area; SEEDL, seed length; SEEDW, seed width; TKW, thousand kernel weight; GPY, grain protein yield; GPSM, grains per square meter; Nmax, maximum NDVI measured; GPA, area of the growing phase; FPA, area of the flowering phase; SPA, area of the senescence phase; DPA, area of the declining phase; TA, total NDVI area; TFN90, 90% of the NDVI amplitude remains; TFN50, 50% of the NDVI amplitude remains; TFN10, 10% of the NDVI amplitude remains; TFN1, 1% of the NDVI amplitude remains. n.s : non-significant.

**Table S9: Mid-parent and Best-parent heterosis of F<sub>1</sub> hybrids in Arvillers.** For each trait, are indicated the number of hybrids tested, the average heterosis, the p-value of the Student test between hybrids and parent lines, the minimal and maximal value as well as the heterosis coefficient of variation.

| Trait | Number of hybrids | Mean (%) | Mid-parent heterosis |         |         |         | $\sigma/\mu$ | Best-parent heterosis |         |              |         |
|-------|-------------------|----------|----------------------|---------|---------|---------|--------------|-----------------------|---------|--------------|---------|
|       |                   |          | p-value              | Min (%) | Max (%) | p-value |              | Min (%)               | Max (%) | $\sigma/\mu$ |         |
| YLD   | 73                | 6.4      | 2.37E-15             | -9.5    | 16.9    | 0.8     | 2.3          | 2.0E-03               | -15.3   | 14.0         | 2.6     |
| GPC   | 67                | -1.1     | 2.96E-03             | -8.6    | 3.3     | -2.6    | -4.4         | 5.6E-17               | -13.4   | 1.9          | -0.7    |
| SW    | 67                | 0.9      | 6.57E-10             | -1.1    | 3.5     | 1.1     | -0.5         | 5.7E-03               | -2.9    | 2.9          | -2.8    |
| HD    | 73                | -2.0     | 8.88E-26             | -5.6    | 0.0     | -0.5    | -4.7         | 1.3E-29               | -9.9    | -0.7         | -0.4    |
| HT    | 73                | 6.0      | 4.90E-17             | -15.3   | 16.8    | 0.8     | -3.7         | 1.4E-05               | -17.0   | 13.7         | -1.8    |
| SEEDA | 67                | 7.5      | 9.27E-29             | 0.0     | 16.2    | 0.4     | 3.7          | 2.3E-10               | -5.9    | 12.8         | 1.1     |
| SEEDL | 67                | 2.8      | 9.99E-18             | -1.8    | 7.9     | 0.7     | 0.0          | n.s                   | -6.5    | 7.0          | -1216.8 |
| SEEDW | 67                | 4.3      | 9.11E-23             | -1.3    | 10.0    | 0.5     | 2.0          | 3.5E-07               | -5.2    | 7.8          | 1.4     |
| TKW   | 67                | 9.4      | 3.39E-22             | -0.4    | 18.7    | 0.5     | 5.4          | 9.0E-08               | -7.1    | 15.8         | 1.1     |
| GPY   | 67                | 6.3      | 2.04E-13             | -11.3   | 17.5    | 0.9     | 2.3          | 1.4E-03               | -11.3   | 15.8         | 2.4     |
| GPSM  | 58                | -2.1     | 7.87E-03             | -13.5   | 9.1     | -2.7    | -6.8         | 3.0E-11               | -23.7   | 7.0          | -0.9    |
| Nmax  | 69                | -0.2     | n.s                  | -4.2    | 3.6     | -9.1    | -1.1         | 8.2E-07               | -4.8    | 3.2          | -1.5    |
| GPA   | 69                | 0.1      | n.s                  | -4.7    | 4.2     | 30.1    | -2.8         | 1.0E-11               | -11.0   | 2.6          | -1.0    |
| FPA   | 69                | -7.2     | 7.18E-10             | -27.2   | 11.3    | -1.2    | -15.7        | 3.3E-19               | -39.8   | 8.8          | -0.7    |
| SPA   | 69                | 5.9      | 1.85E-04             | -20.0   | 35.0    | 2.1     | -5.0         | 4.1E-04               | -32.2   | 19.7         | -2.2    |
| DPA   | 69                | -2.7     | 1.87E-06             | -12.2   | 6.8     | -1.6    | -6.5         | 3.4E-16               | -16.6   | 6.1          | -0.8    |
| TA    | 69                | -1.9     | 2.25E-06             | -8.9    | 4.6     | -1.6    | -4.6         | 4.8E-16               | -12.2   | 4.5          | -0.8    |
| TFN90 | 69                | 5.8      | 6.58E-11             | -9.0    | 21.4    | 1.1     | 1.5          | n.s                   | -12.1   | 15.0         | 4.2     |
| TFN50 | 69                | 4.1      | 2.00E-13             | -2.8    | 14.7    | 0.9     | -0.2         | n.s                   | -7.5    | 9.5          | -14.9   |
| TFN10 | 69                | 3.1      | 1.33E-07             | -5.6    | 11.3    | 1.4     | -1.5         | 6.6E-03               | -11.7   | 10.7         | -2.9    |
| TFN1  | 69                | 2.4      | 1.26E-03             | -10.6   | 14.9    | 2.5     | -2.5         | 9.1E-04               | -16.4   | 12.7         | -2.4    |

YLD, grain yield; GPC, grain protein content; SW, specific weight; HD, heading date; HT, plant height; SEEDA, seed area; SEEDL, seed length; SEEDW, seed width; TKW, thousand kernel weight; GPY, grain protein yield; GPSM, grains per square meter; Nmax, maximum NDVI measured; GPA, area of the growing phase; FPA, area of the flowering phase; SPA, area of the senescence phase; DPA, area of the declining phase; TA, total NDVI area; TFN90, 90% of the NDVI amplitude remains; TFN50, 50% of the NDVI amplitude remains; TFN10, 10% of the NDVI amplitude remains; TFN1, 1% of the NDVI amplitude remains. n.s : non-significant.

**Table S10: Mid-parent and Best-parent heterosis of F<sub>1</sub> hybrids in Pomacle.** For each trait, are indicated the number of hybrids tested, the average heterosis, the p-value of the Student test between hybrids and parent lines, the minimal and maximal value as well as the heterosis coefficient of variation.

| Trait | Number of hybrids | Mid-parent heterosis |         |         |         |              | Best-parent heterosis |         |         |         |              |
|-------|-------------------|----------------------|---------|---------|---------|--------------|-----------------------|---------|---------|---------|--------------|
|       |                   | Mean (%)             | p-value | Min (%) | Max (%) | $\sigma/\mu$ | Mean (%)              | p-value | Min (%) | Max (%) | $\sigma/\mu$ |
| YLD   | 82                | 5.2                  | 6.6E-06 | -22.0   | 23.7    | 1.9          | -0.8                  | n.s     | -26.4   | 18.7    | -11.1        |
| GPC   | 79                | -0.6                 | n.s     | -6.5    | 8.6     | -5.5         | -3.5                  | 1.4E-10 | -13.5   | 8.4     | -1.2         |
| SW    | 79                | 0.5                  | 3.6E-07 | -1.8    | 3.1     | 1.6          | -0.4                  | 1.2E-03 | -3.2    | 1.7     | -2.6         |
| HD    | 82                | -2.6                 | 1.8E-28 | -5.8    | 1.1     | -0.5         | -5.6                  | 3.2E-34 | -9.7    | 0.0     | -0.4         |
| HT    | 82                | 6.5                  | 1.3E-17 | -6.7    | 21.1    | 0.8          | -1.7                  | 4.2E-02 | -17.0   | 18.3    | -4.4         |
| SEEDA | 78                | 5.7                  | 1.4E-16 | -5.8    | 23.7    | 0.8          | 0.3                   | n.s     | -13.5   | 16.5    | 16.0         |
| SEEDL | 78                | 2.3                  | 1.4E-17 | -2.8    | 7.3     | 0.8          | -1.0                  | 3.9E-03 | -9.0    | 3.2     | -2.9         |
| SEEDW | 78                | 3.1                  | 6.1E-15 | -4.3    | 14.5    | 0.9          | 1.0                   | 9.1E-03 | -7.1    | 12.6    | 3.3          |
| TKW   | 79                | 7.6                  | 6.2E-27 | -2.2    | 15.1    | 0.5          | 2.4                   | 6.9E-05 | -11.4   | 12.2    | 2.3          |
| GPY   | 79                | 4.8                  | 3.7E-05 | -20.0   | 24.2    | 2.0          | -0.3                  | n.s     | -21.7   | 21.3    | -34.7        |
| GPSM  | 79                | -2.4                 | 1.2E-02 | -24.3   | 14.9    | -3.4         | -7.2                  | 1.8E-12 | -27.1   | 7.9     | -1.1         |
| Nmax  | 80                | 2.8                  | 4.8E-06 | -12.9   | 21.9    | 1.8          | 0.1                   | n.s     | -13.0   | 13.5    | 31.3         |
| GPA   | 80                | 2.5                  | 3.7E-06 | -13.4   | 17.1    | 1.8          | -1.0                  | 1.9E-02 | -15.4   | 11.4    | -3.7         |
| FPA   | 80                | -0.8                 | n.s     | -21.8   | 22.1    | -9.3         | -7.4                  | 2.8E-12 | -29.3   | 15.1    | -1.1         |
| SPA   | 80                | 0.5                  | n.s     | -24.5   | 24.5    | 20.4         | -4.2                  | 5.1E-04 | -25.2   | 15.9    | -2.5         |
| DPA   | 80                | -0.4                 | n.s     | -15.6   | 10.1    | -13.0        | -5.0                  | 1.1E-11 | -25.3   | 9.0     | -1.1         |
| TA    | 80                | 1.1                  | 1.1E-02 | -11.5   | 12.3    | 3.4          | -2.3                  | 3.1E-07 | -16.4   | 5.7     | -1.6         |
| TFN90 | 80                | 4.2                  | 1.3E-06 | -14.8   | 21.8    | 1.7          | -1.7                  | 5.3E-02 | -21.0   | 14.5    | -4.5         |
| TFN50 | 80                | 3.1                  | 1.7E-07 | -6.9    | 13.7    | 1.5          | -1.3                  | 3.3E-02 | -13.3   | 11.2    | -4.1         |
| TFN10 | 80                | 2.5                  | 5.0E-05 | -8.5    | 19.2    | 2.1          | -1.5                  | 2.1E-02 | -12.6   | 16.9    | -3.8         |
| TFN1  | 80                | 2.0                  | 5.6E-03 | -11.6   | 23.3    | 3.1          | -1.8                  | 2.2E-02 | -14.0   | 21.3    | -3.8         |

YLD, grain yield; GPC, grain protein content; SW, specific weight; HD, heading date; HT, plant height; SEEDA, seed area; SEEDL, seed length; SEEDW, seed width; TKW, thousand kernel weight; GPY, grain protein yield; GPSM, grains per square meter; Nmax, maximum NDVI measured; GPA, area of the growing phase; FPA, area of the flowering phase; SPA, area of the senescence phase; DPA, area of the declining phase; TA, total NDVI area; TFN90, 90% of the NDVI amplitude remains; TFN50, 50% of the NDVI amplitude remains; TFN10, 10% of the NDVI amplitude remains; TFN1, 1% of the NDVI amplitude remains. n.s : non-significant.

**Table S11: Mid-parent and Best-parent heterosis of the five best F<sub>1</sub> hybrids for yield in the three locations.**

| Trait | Mid-parent heterosis | Best-parent heterosis |
|-------|----------------------|-----------------------|
| YLD   | 10.5                 | 6.9                   |
| GPC   | -1.0                 | -3.3                  |
| SW    | 1.1                  | -0.2                  |
| HD    | -1.6                 | -5.7                  |
| HT    | 7.4                  | -1.9                  |
| SEEDA | 5.4                  | 2.4                   |
| SEEDL | 1.2                  | -0.4                  |
| SEEDW | 3.6                  | 2.5                   |
| TKW   | 9.4                  | 5.5                   |
| GPY   | 7.0                  | 5.1                   |
| GPSM  | -1.0                 | -4.6                  |
| Nmax  | 1.6                  | 0.1                   |
| GPA   | 1.1                  | -2.1                  |
| FPA   | -1.8                 | -13.1                 |
| SPA   | 5.1                  | -2.9                  |
| DPA   | 1.3                  | -3.8                  |
| TA    | 1.3                  | -1.7                  |
| TFN90 | 6.8                  | 1.2                   |
| TFN50 | 6.5                  | -0.5                  |
| TFN10 | 6.2                  | -1.6                  |
| TFN1  | 6.1                  | -2.4                  |

YLD, grain yield; GPC, grain protein content; SW, specific weight; HD, heading date; HT, plant height; SEEDA, seed area; SEEDL, seed length; SEEDW, seed width; TKW, thousand kernel weight; GPY, grain protein yield; GPSM, grains per square meter; Nmax, maximum NDVI measured; GPA, area of the growing phase; FPA, area of the flowering phase; SPA, area of the senescence phase; DPA, area of the declining phase; TA, total NDVI area; TFN90, 90% of the NDVI amplitude remains; TFN50, 50% of the NDVI amplitude remains; TFN10, 10% of the NDVI amplitude remains; TFN1, 1% of the NDVI amplitude remains. n.s : non-significant.
