# Supplementary figures and images for: Dissecting Bread Wheat Heterosis through the Integration of Agronomic and Physiological Traits
Source: MDPI journal article supplement (doi:10.3390/biology10090907), 2021-09-13

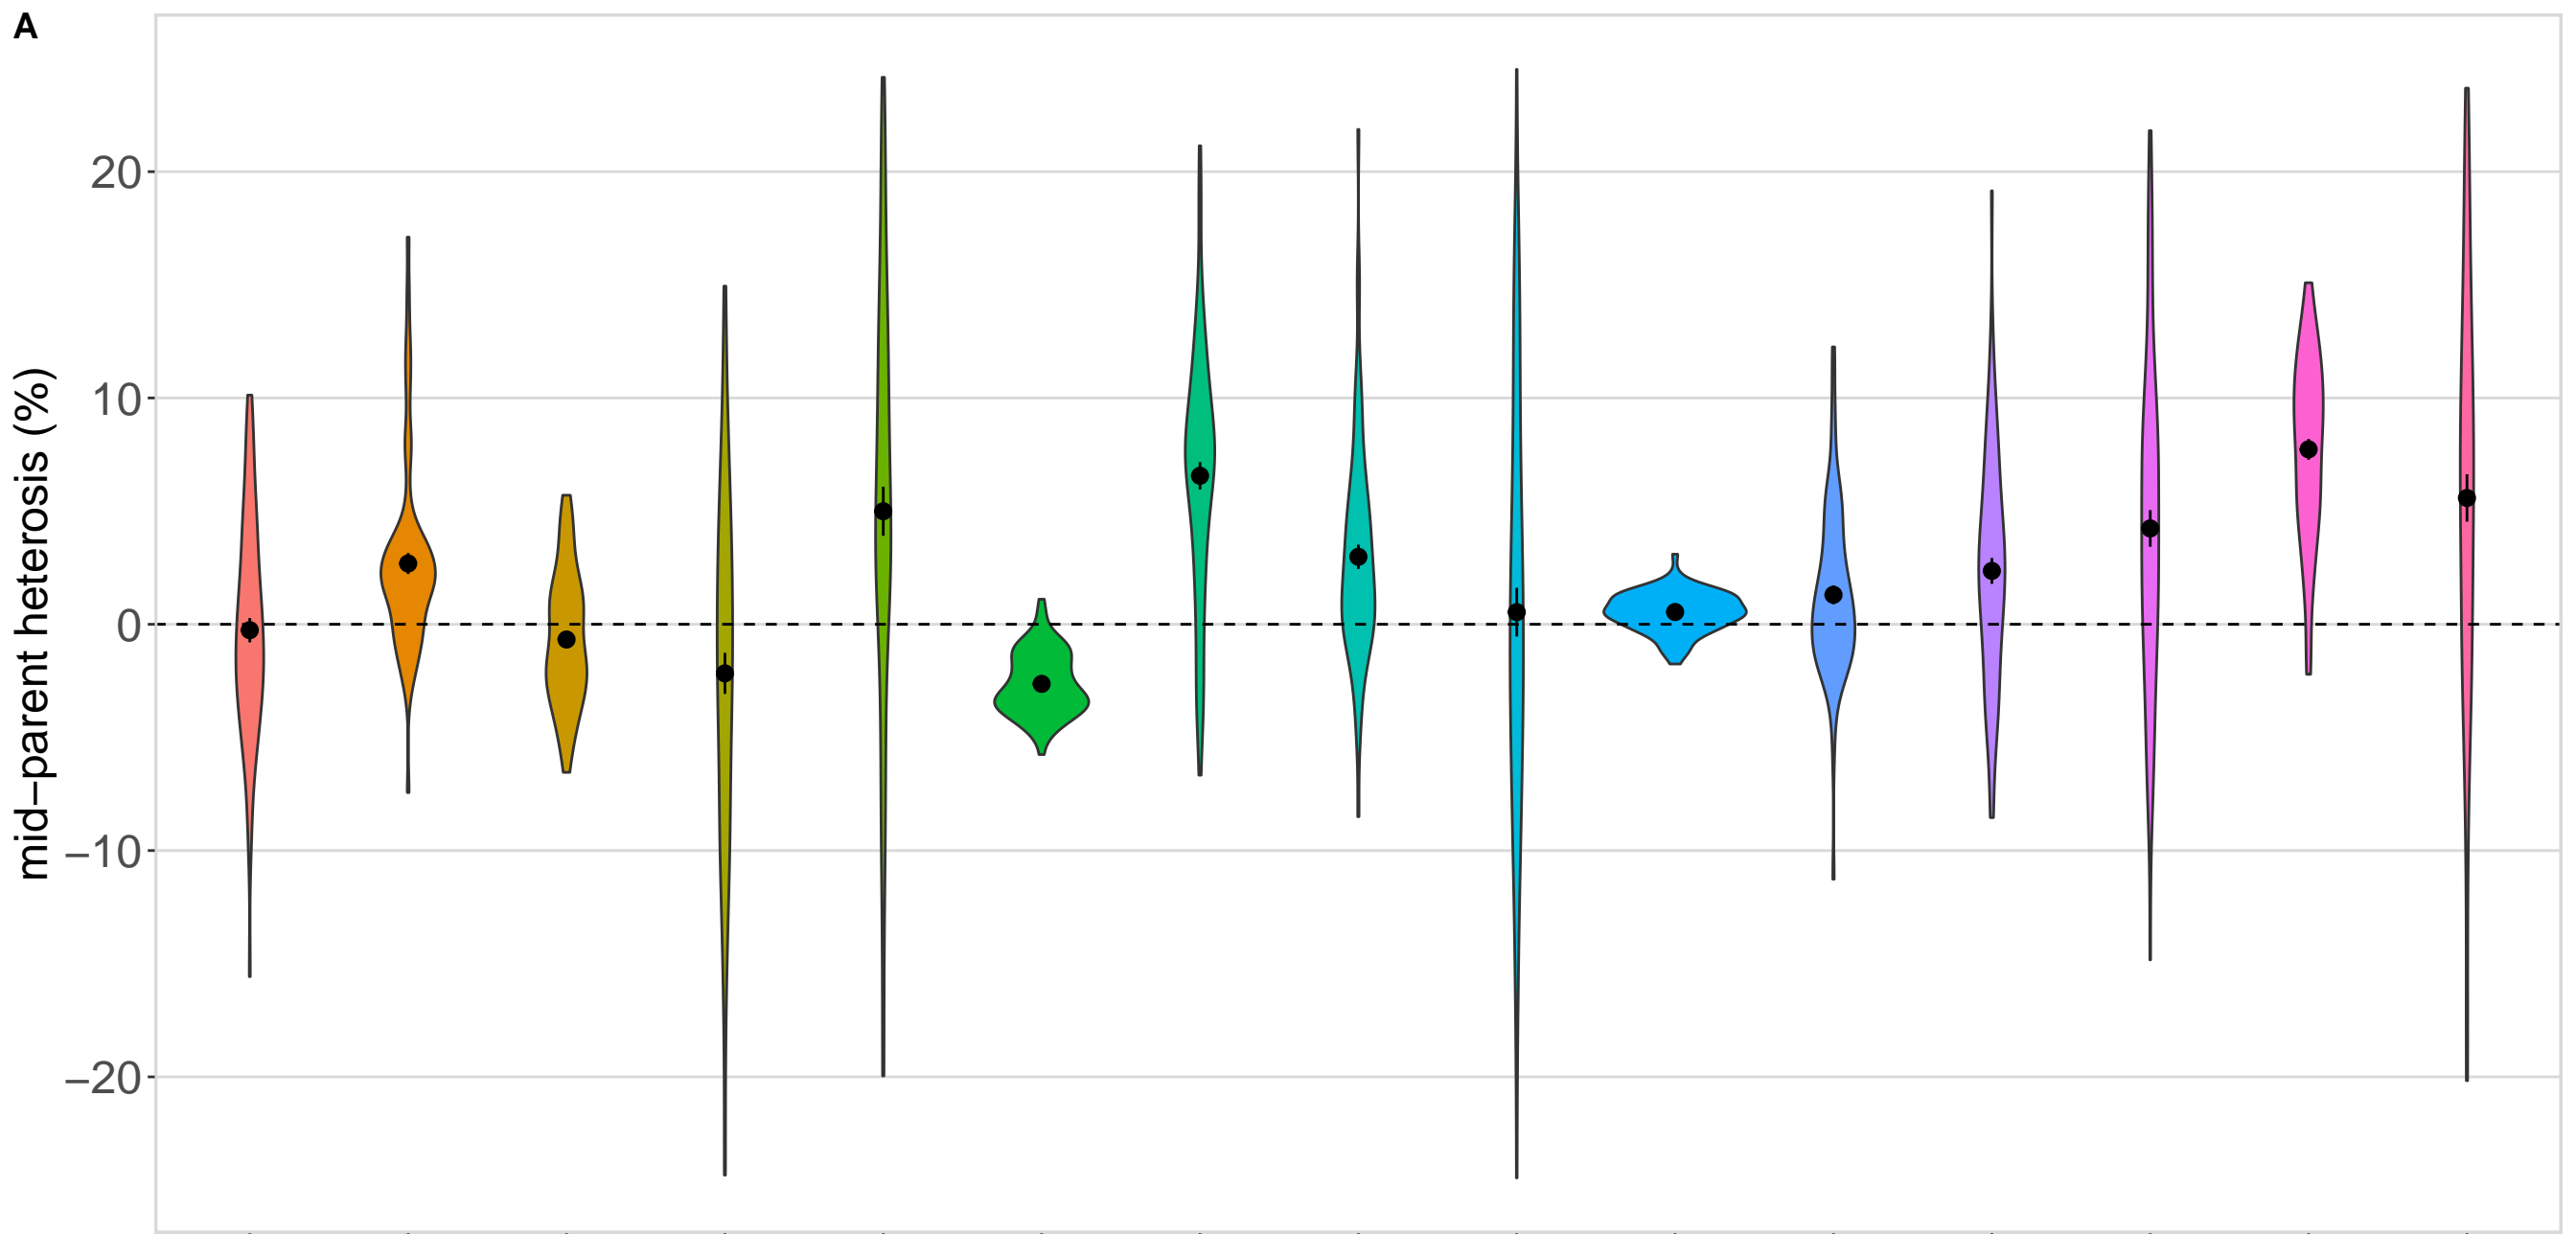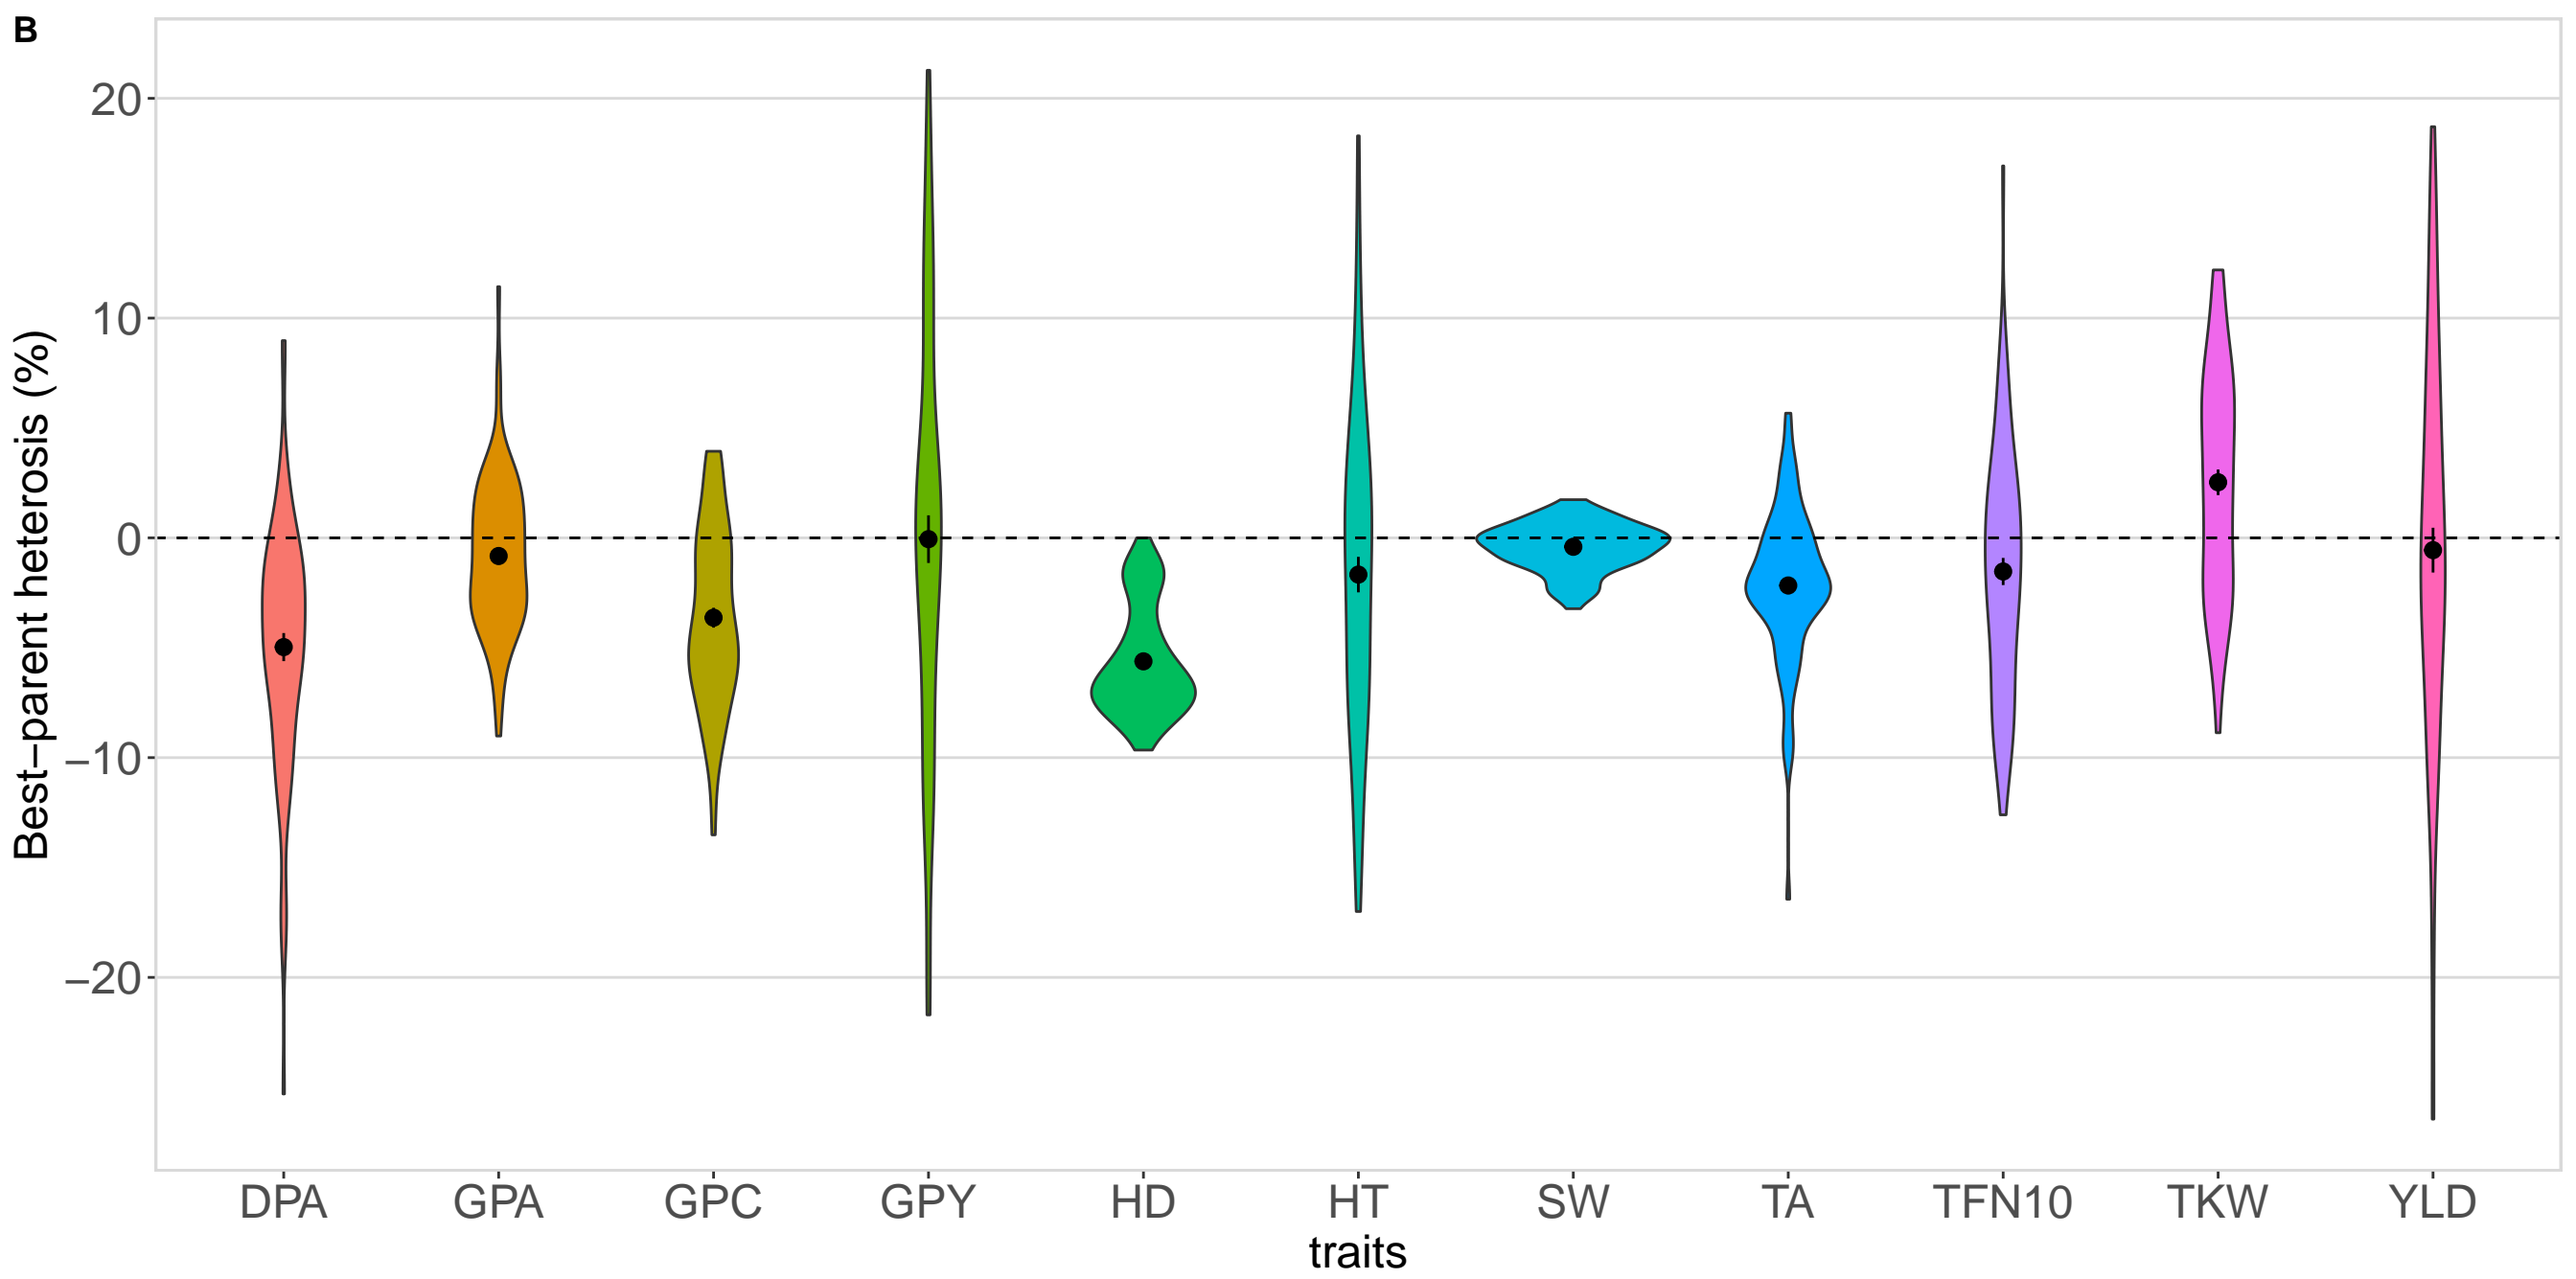

Supplement: s1 [file s1]

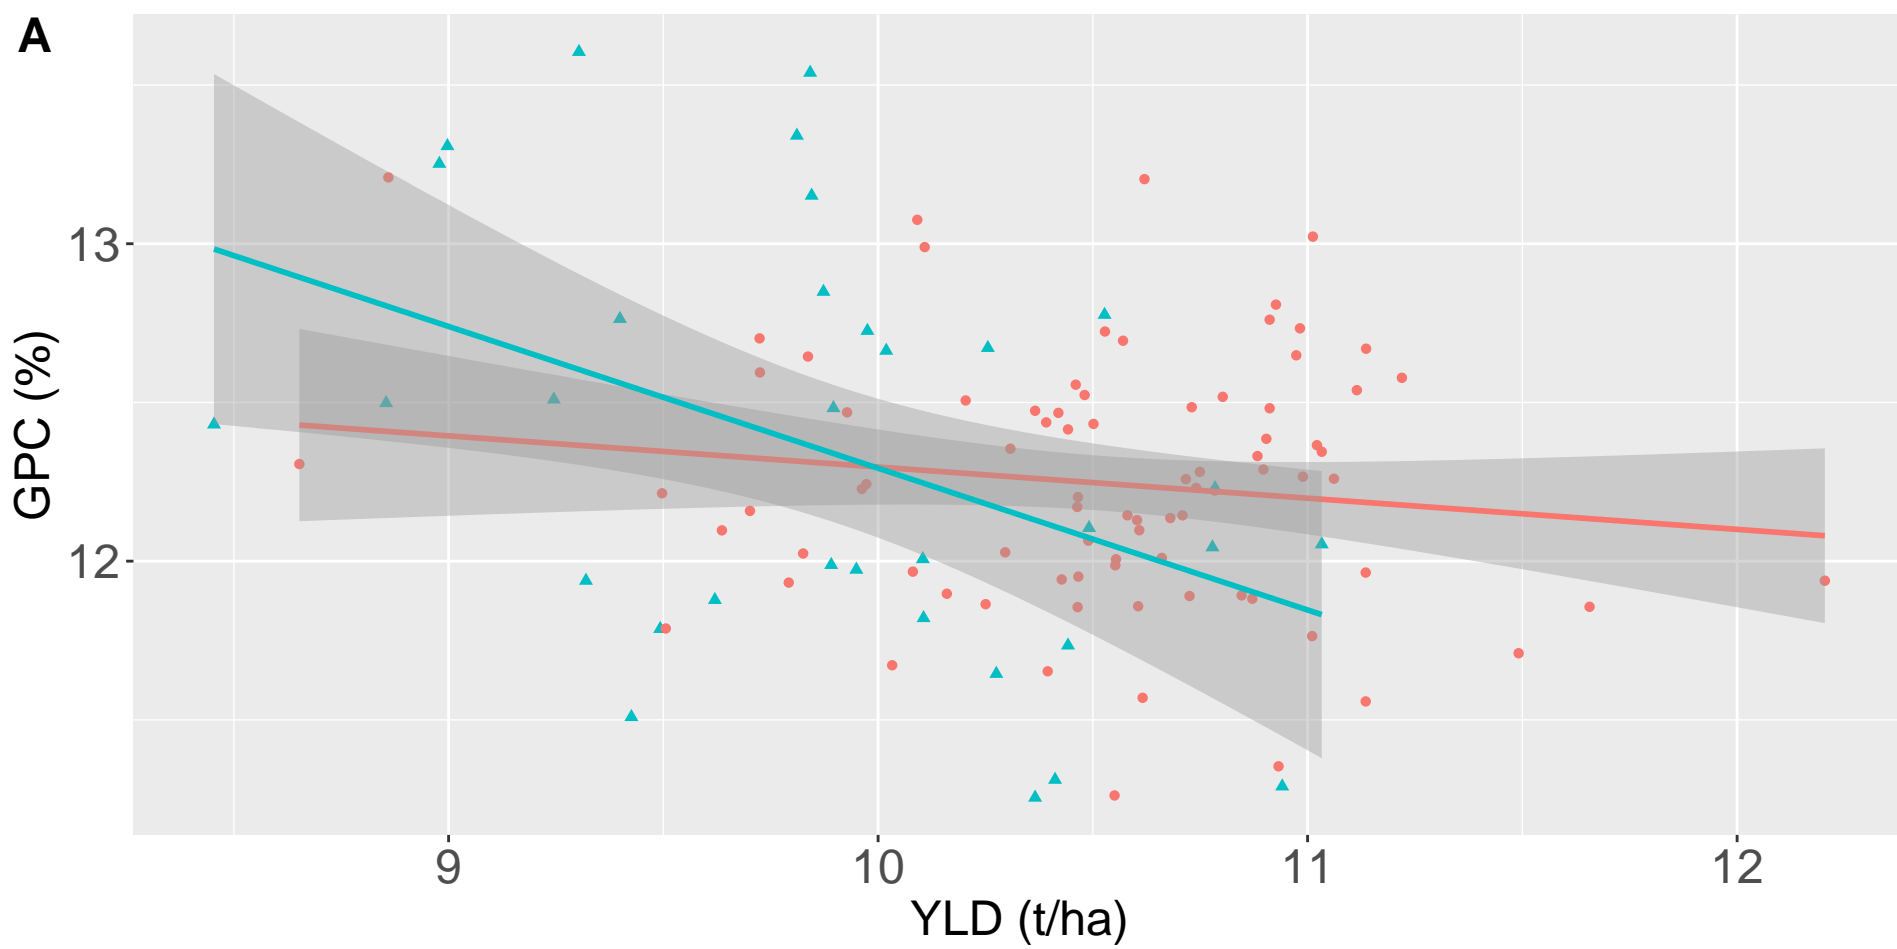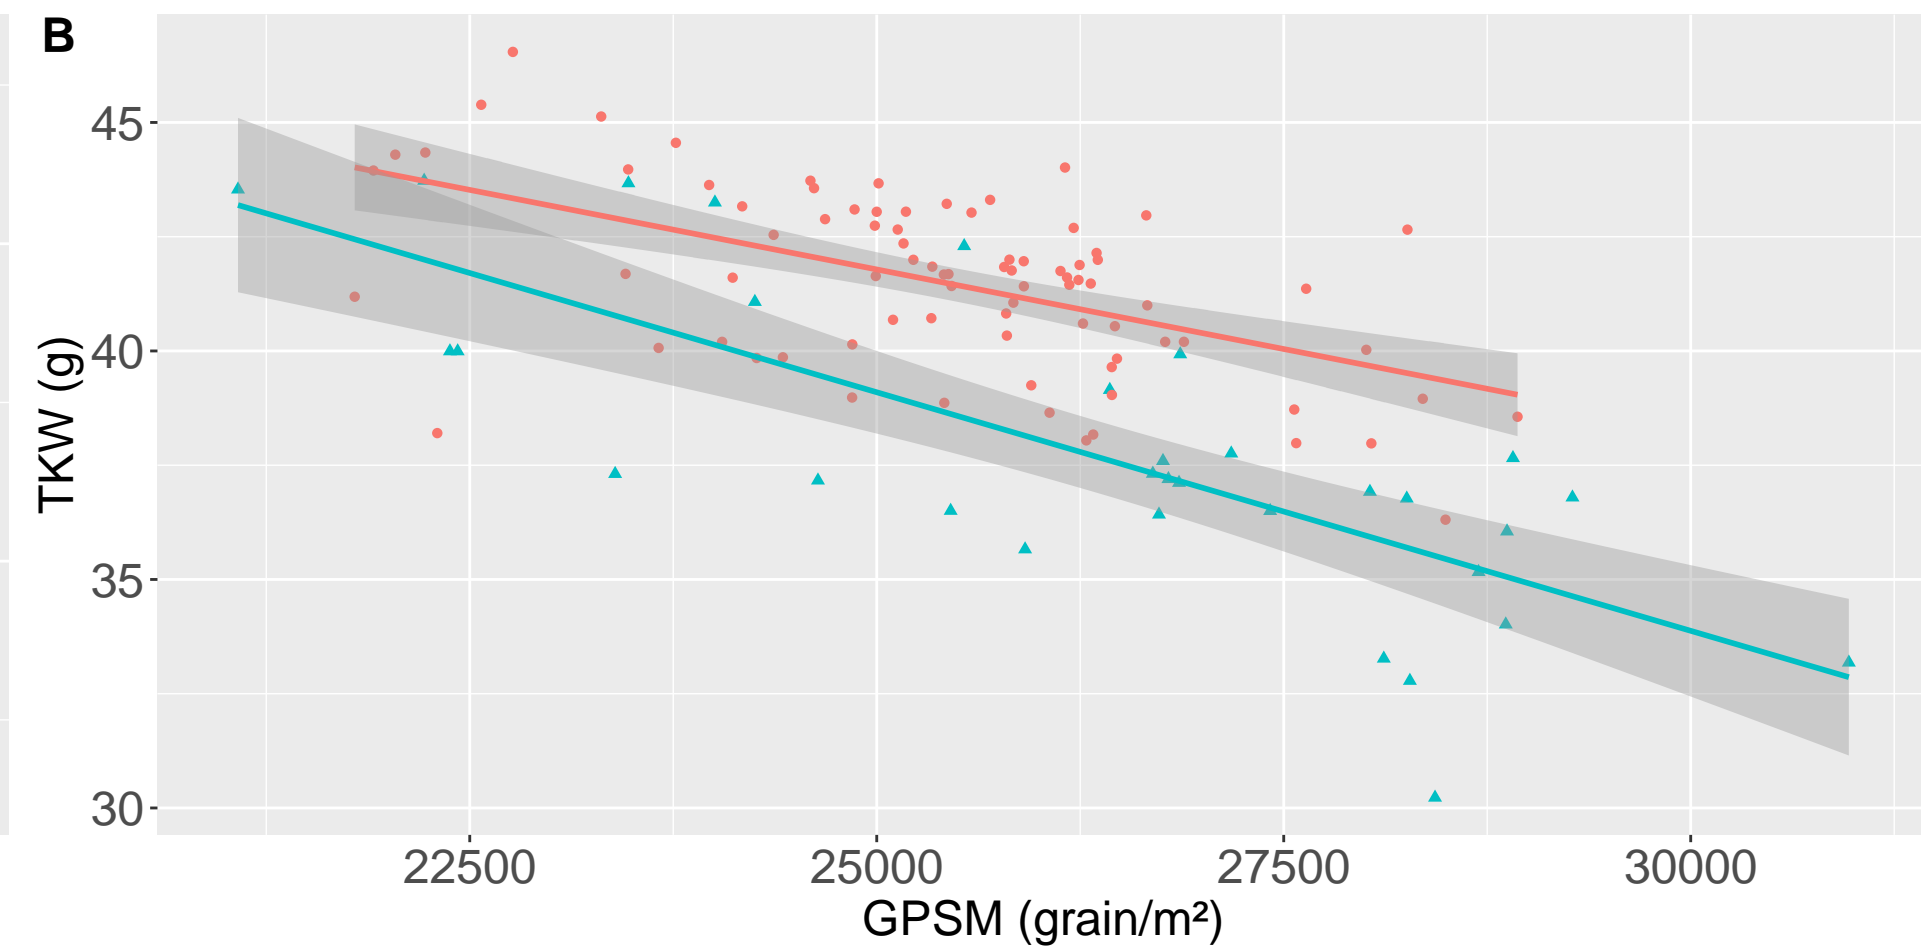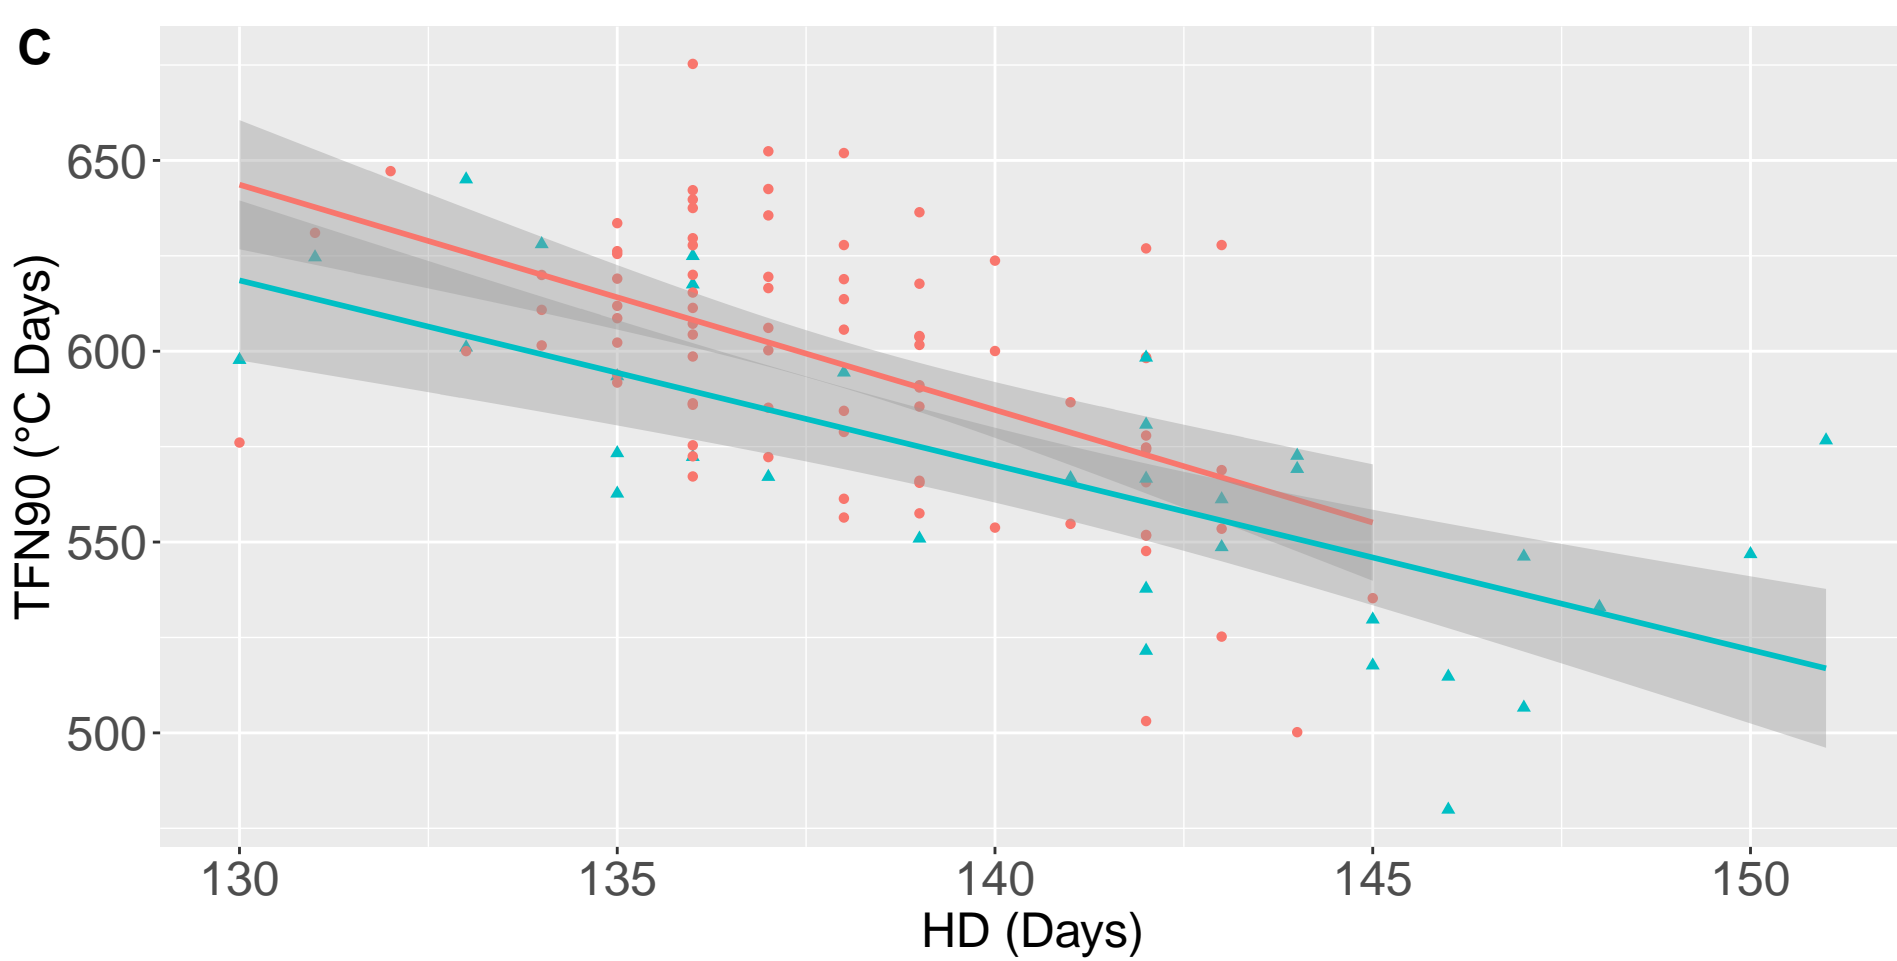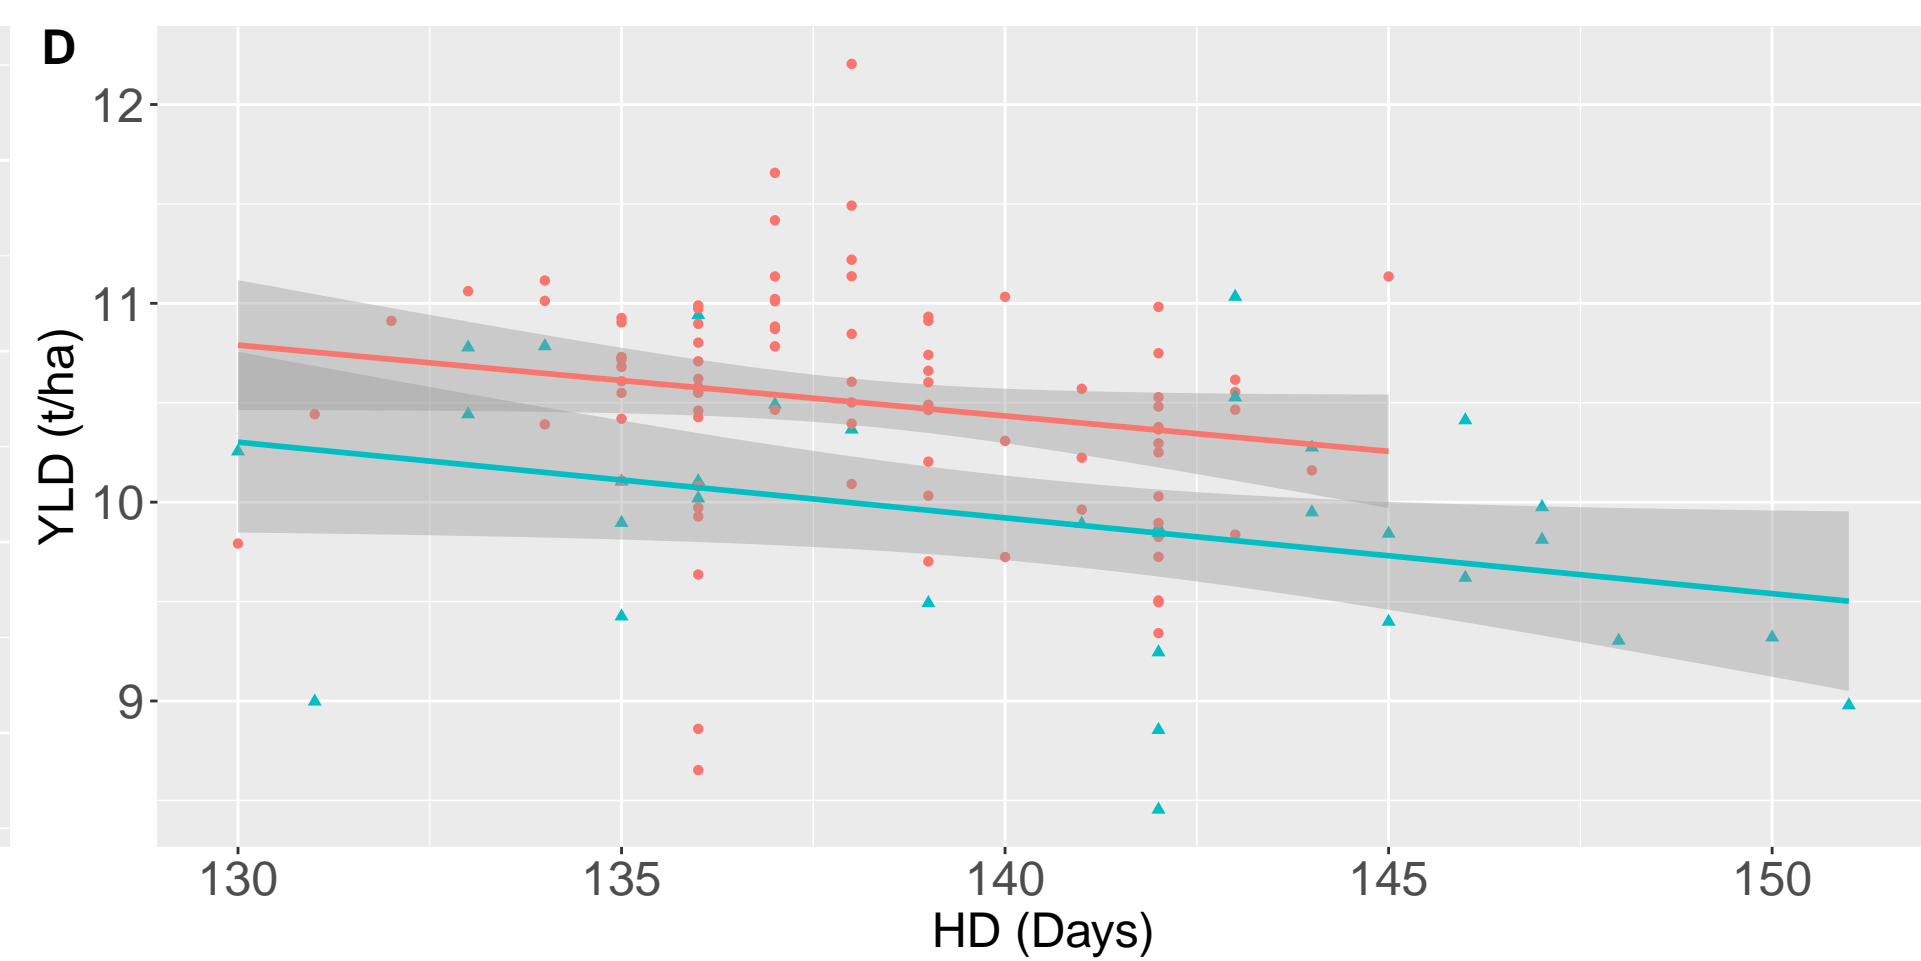

Supplement: s1 [file s1]

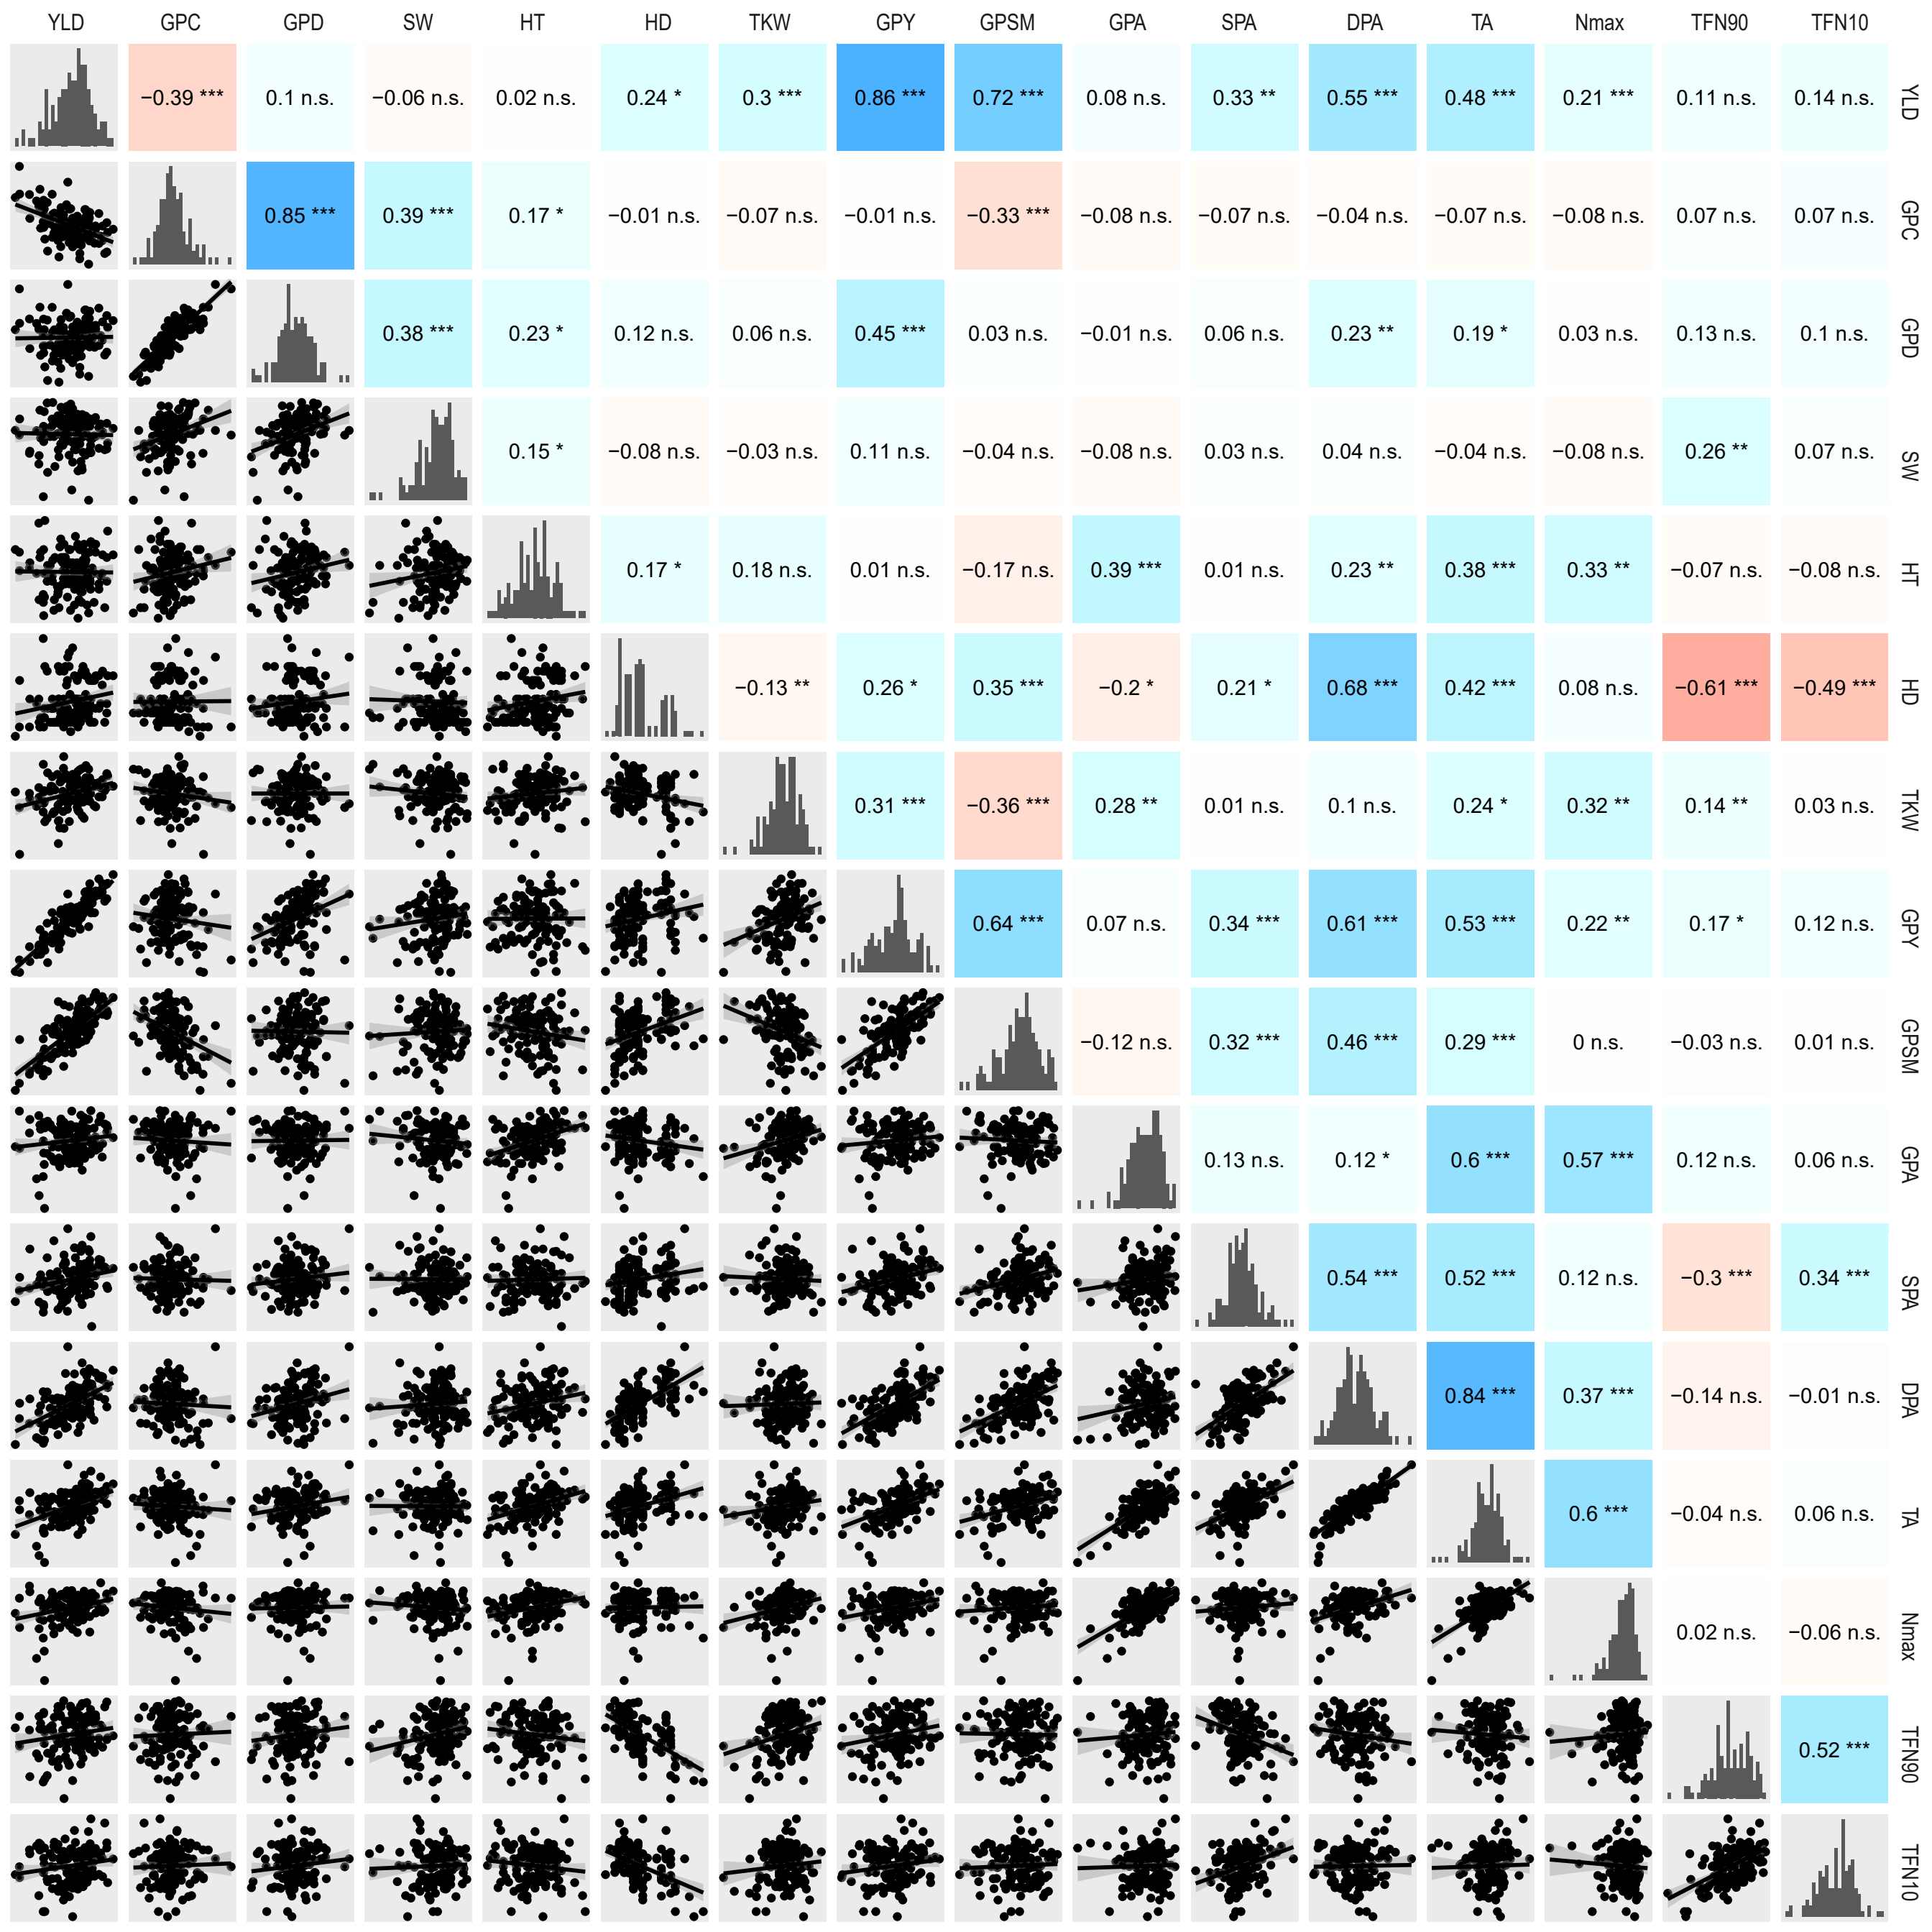

Supplement: s1 [file s1]

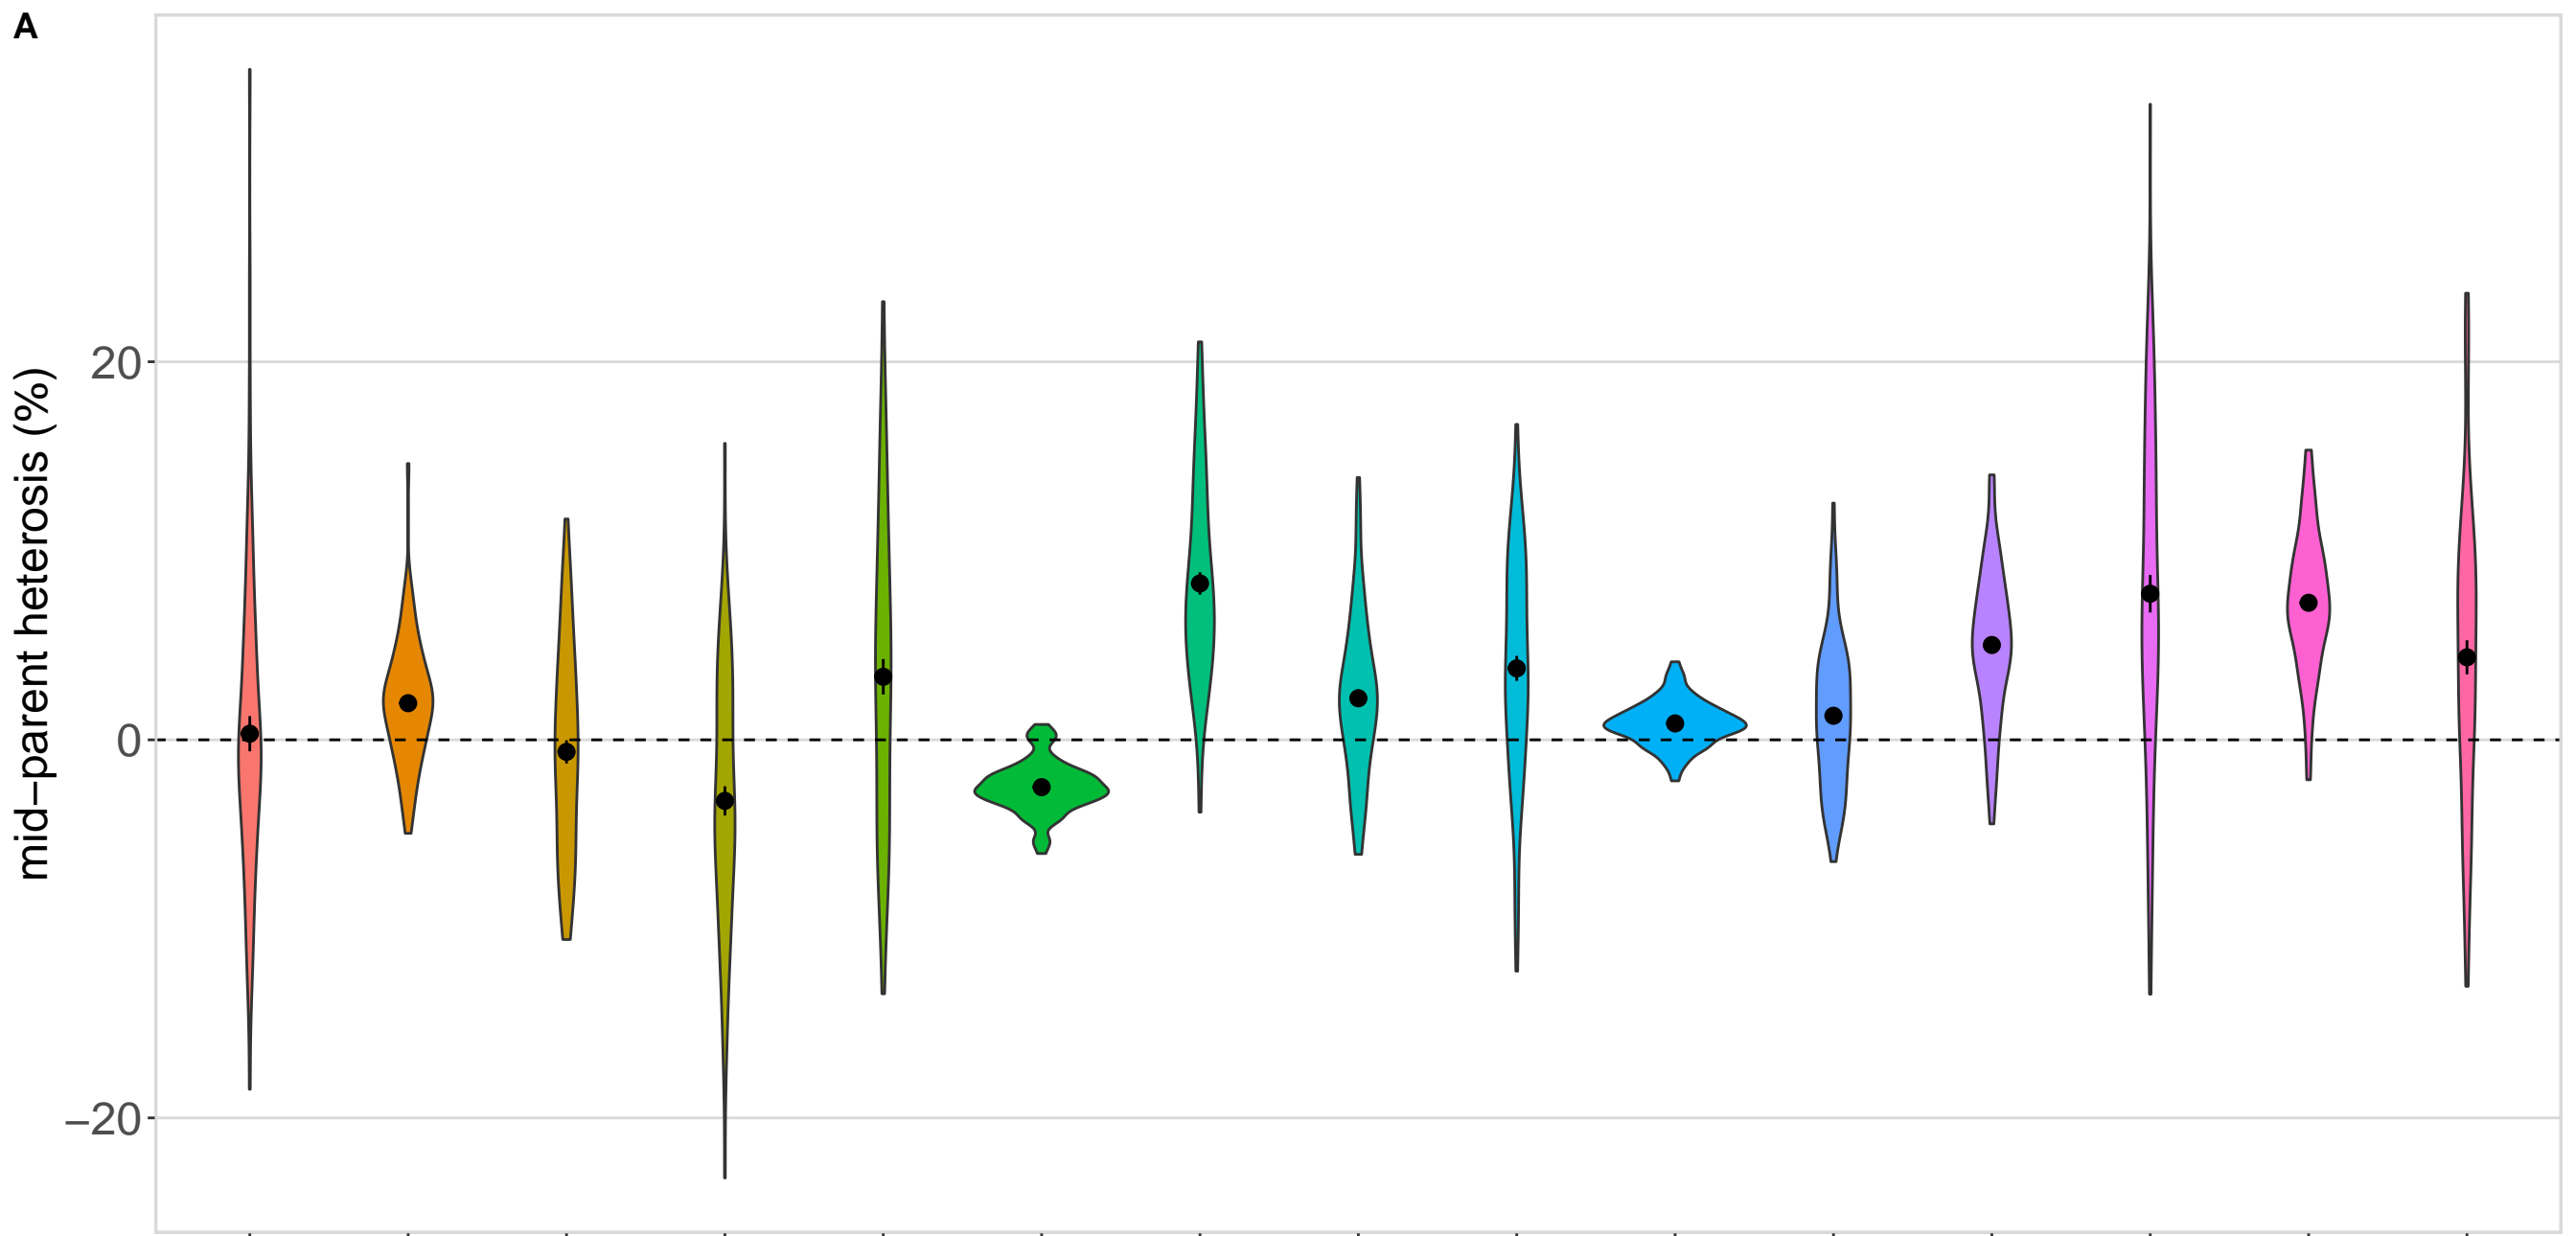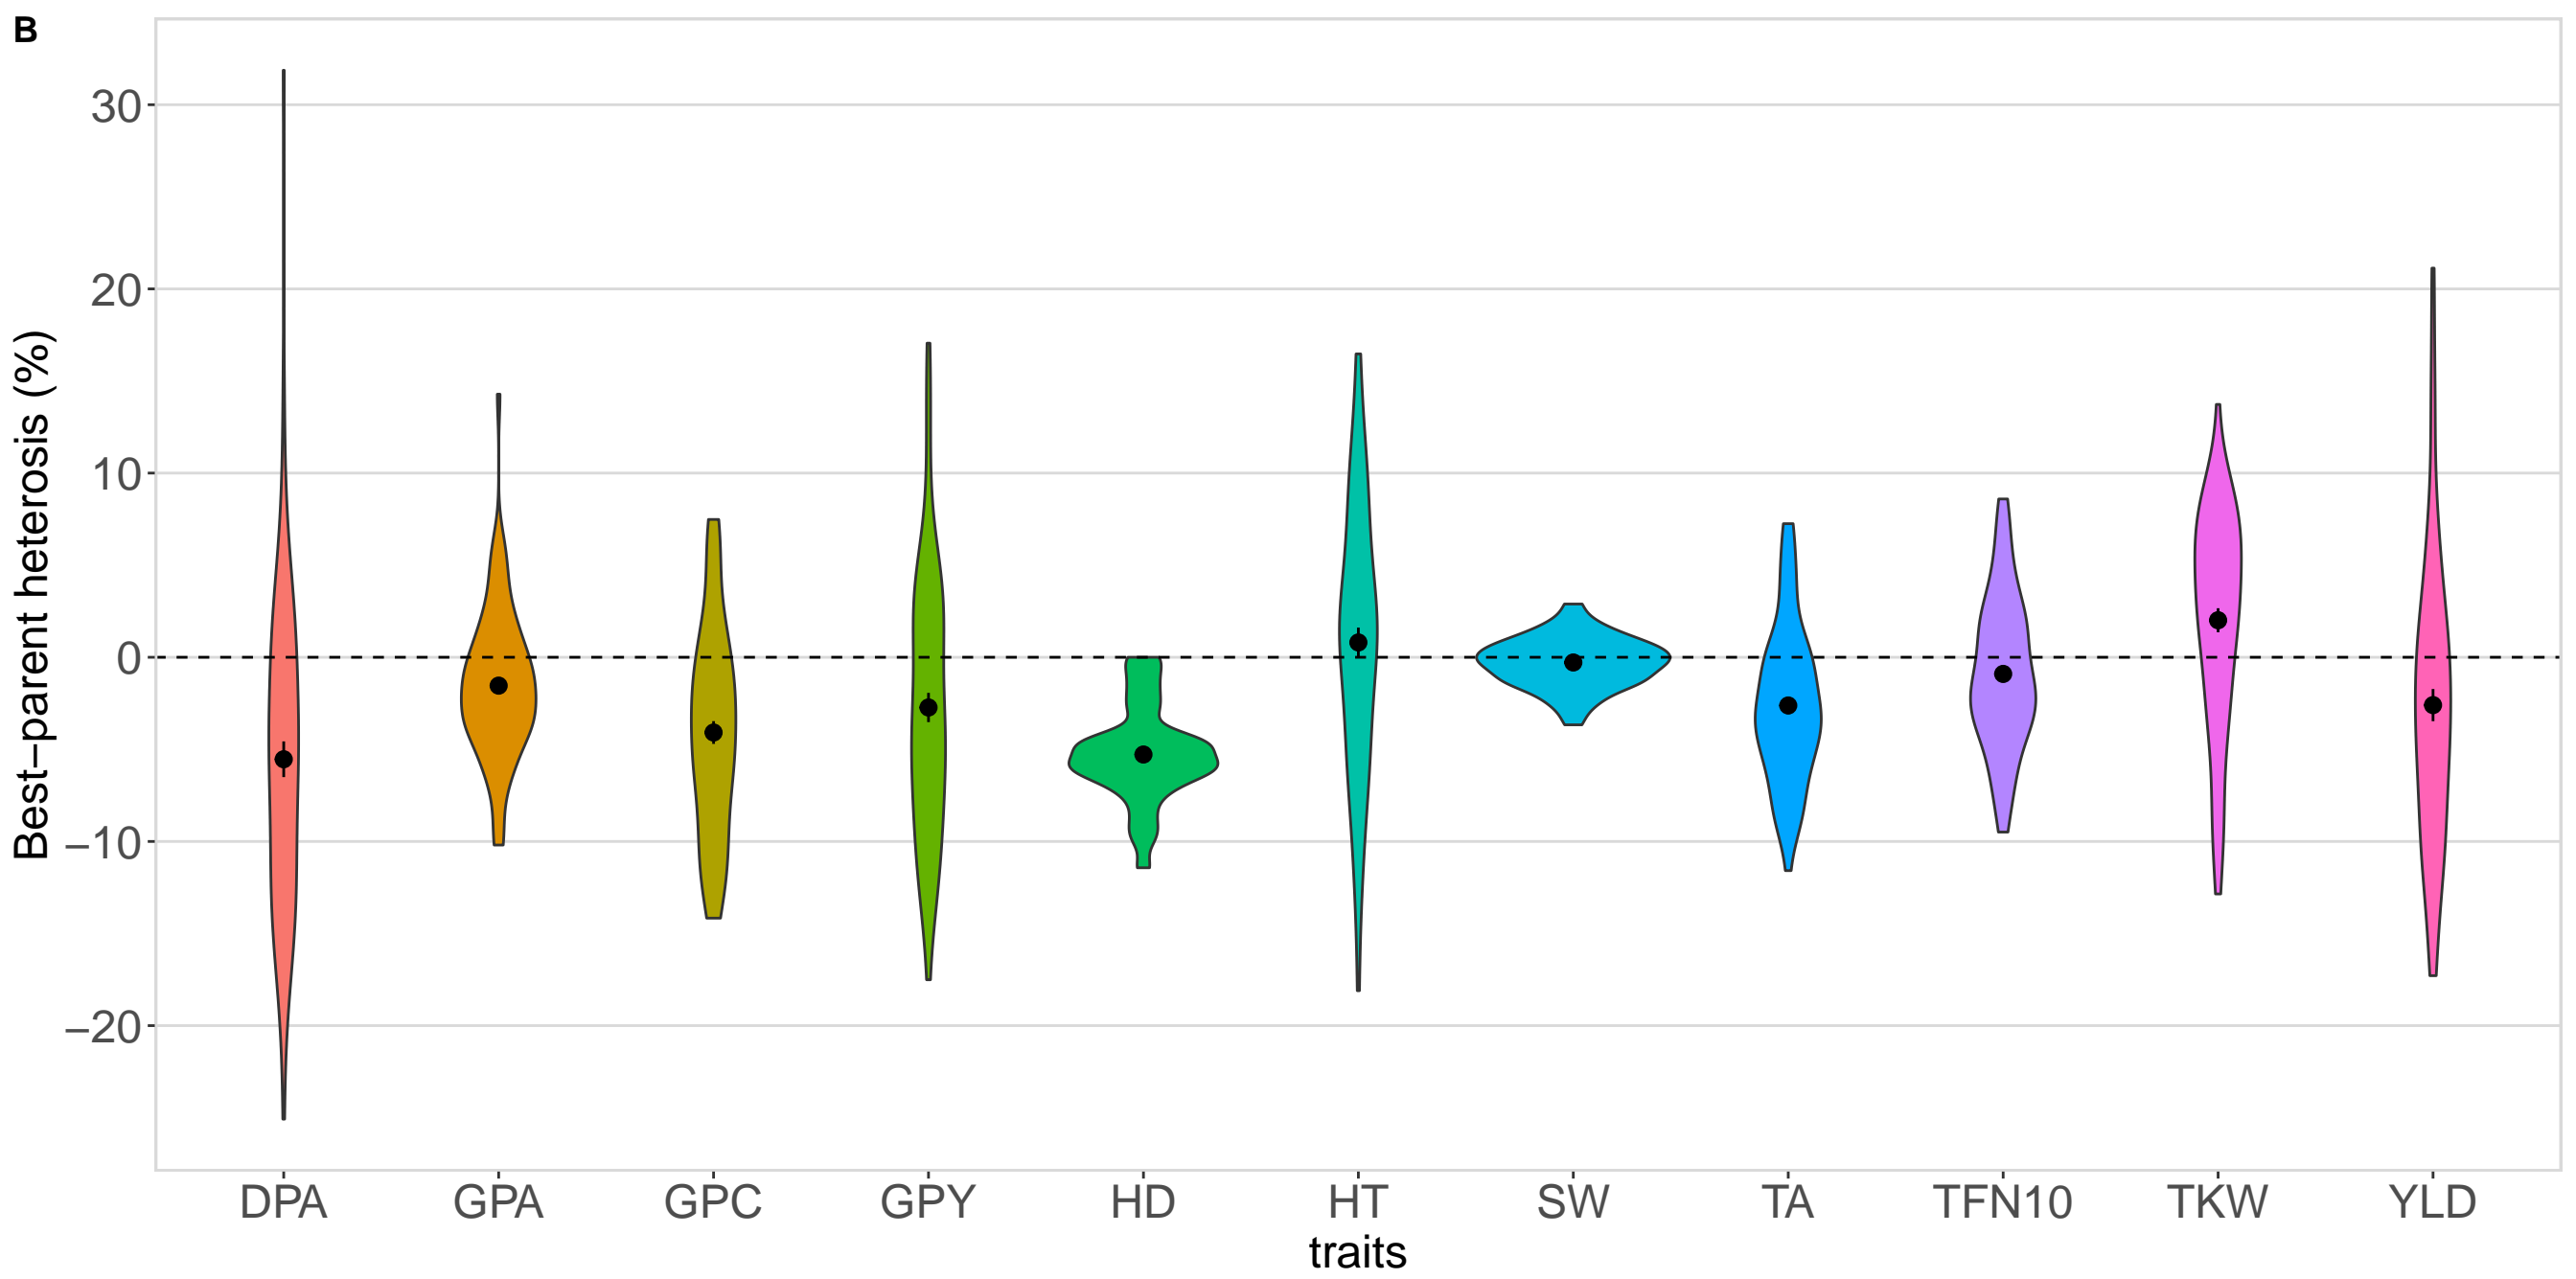

Supplement: s1 [file s1]

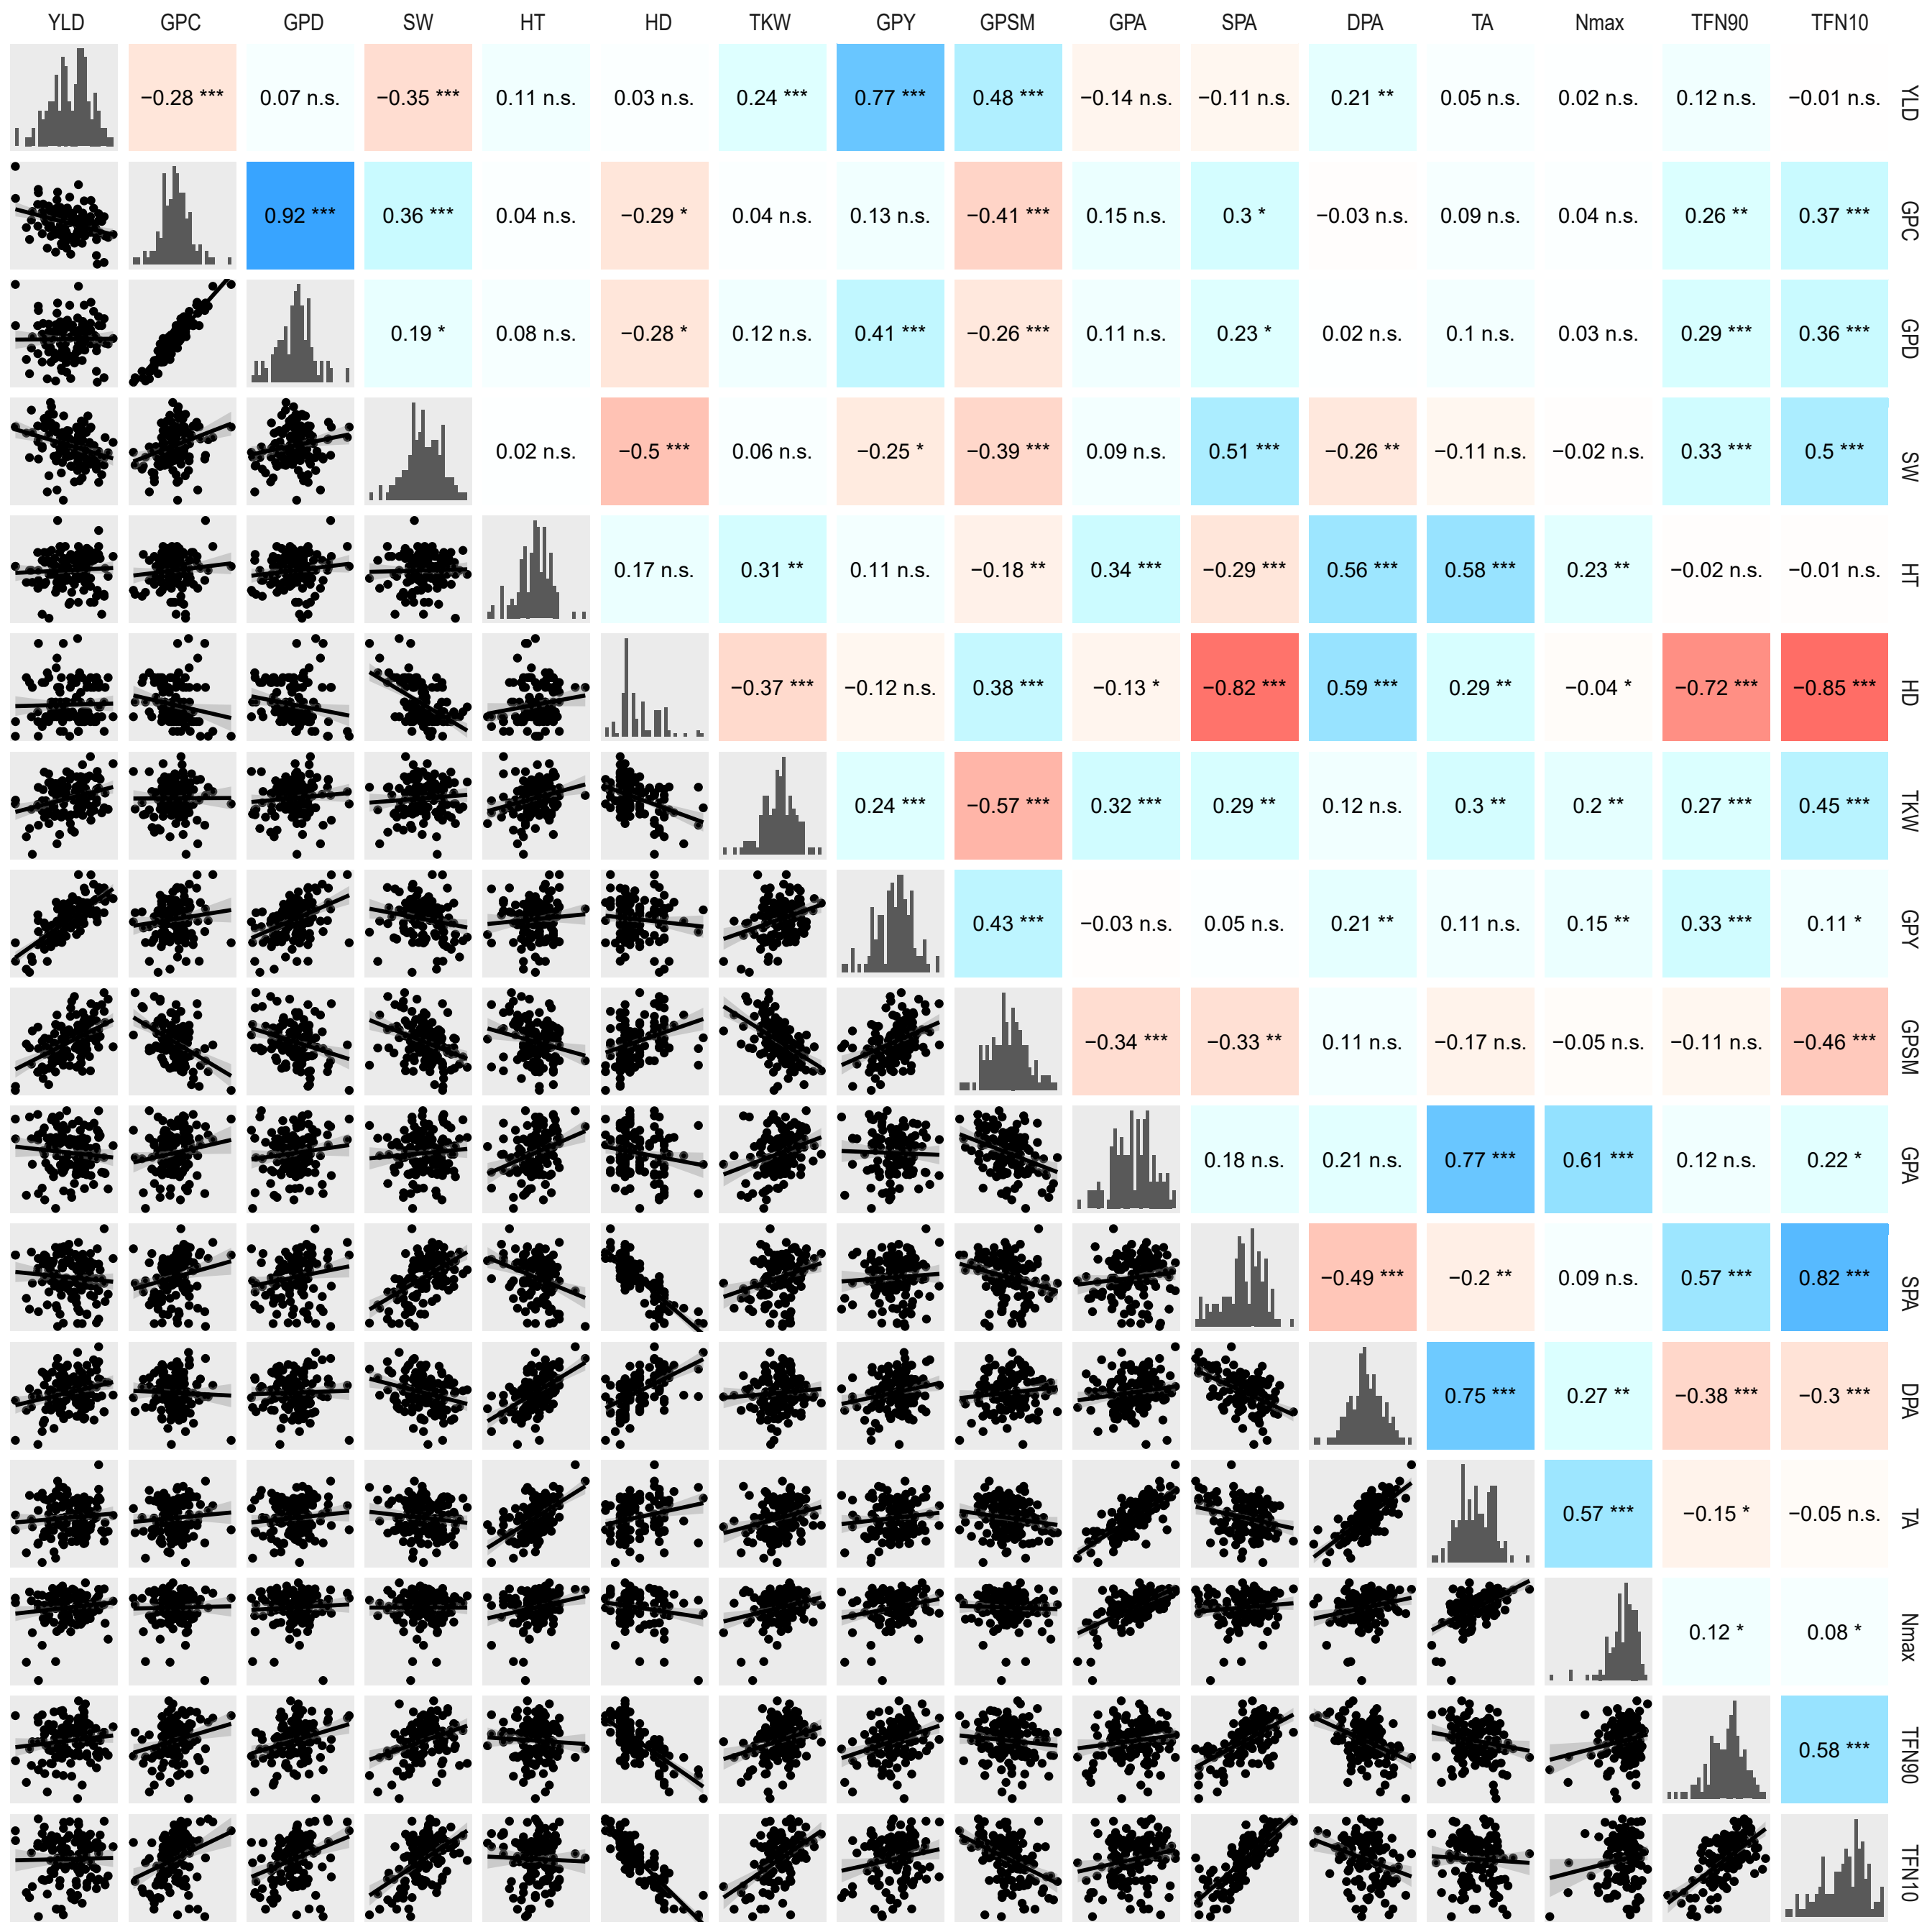

Supplement: s1 [file s1]

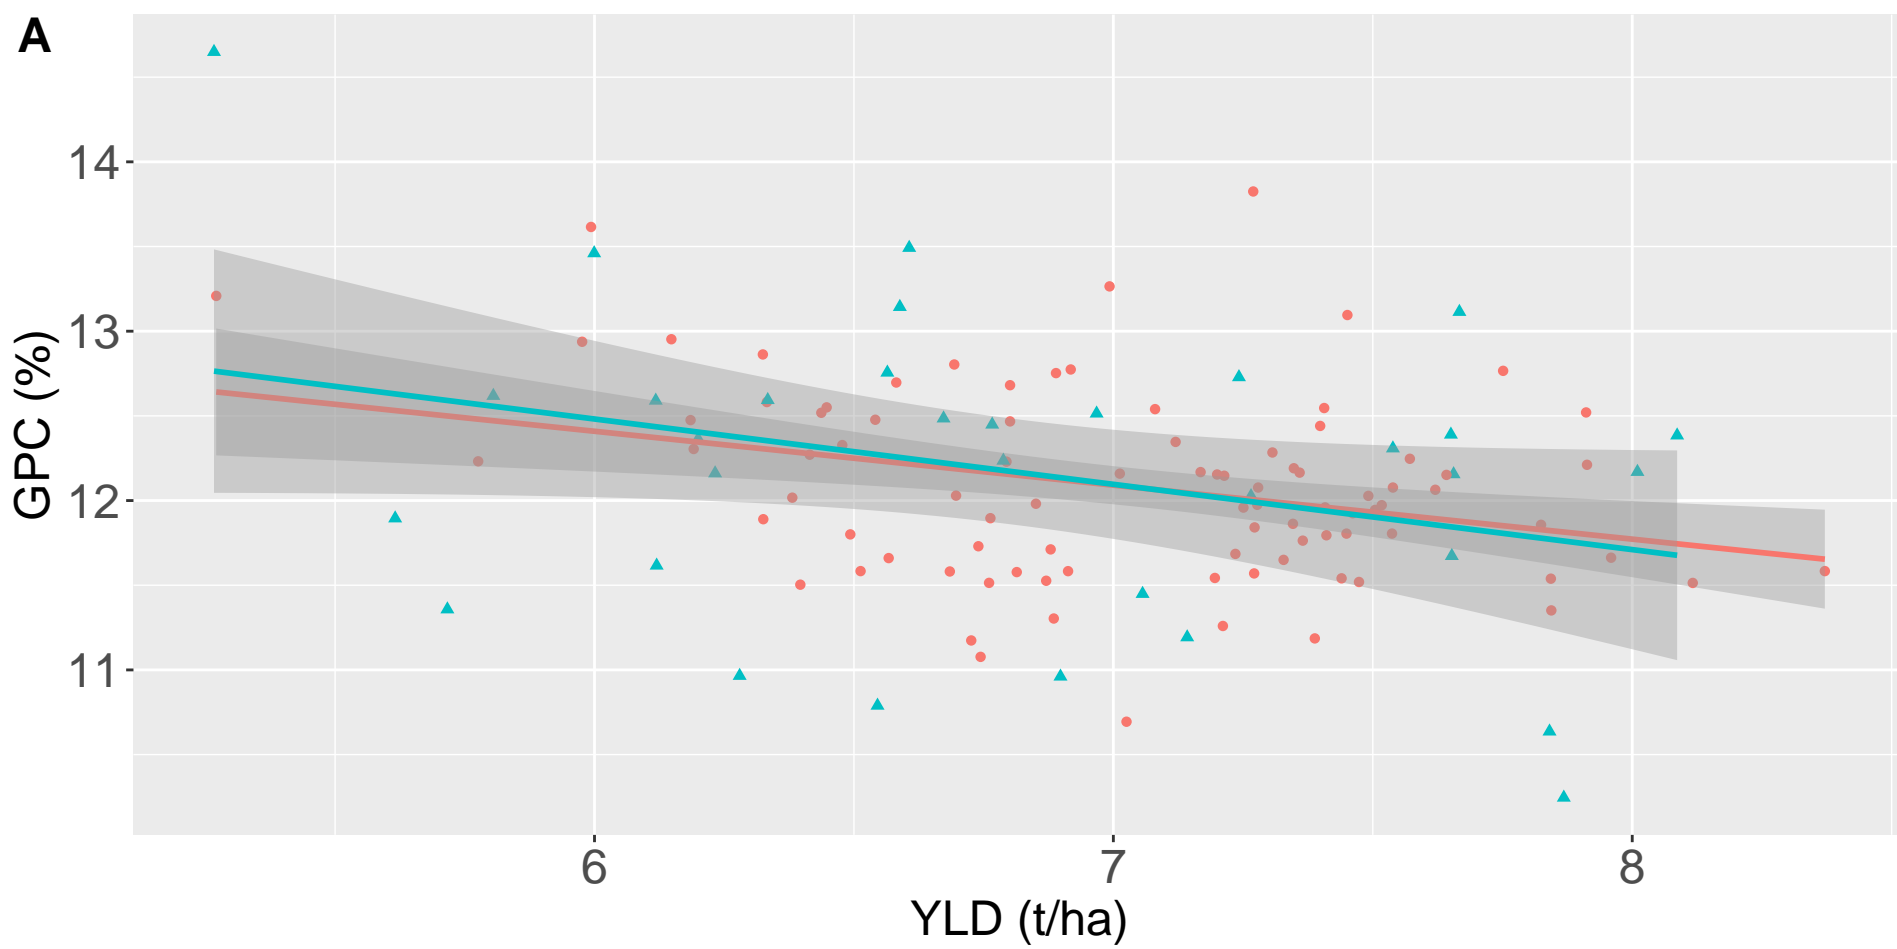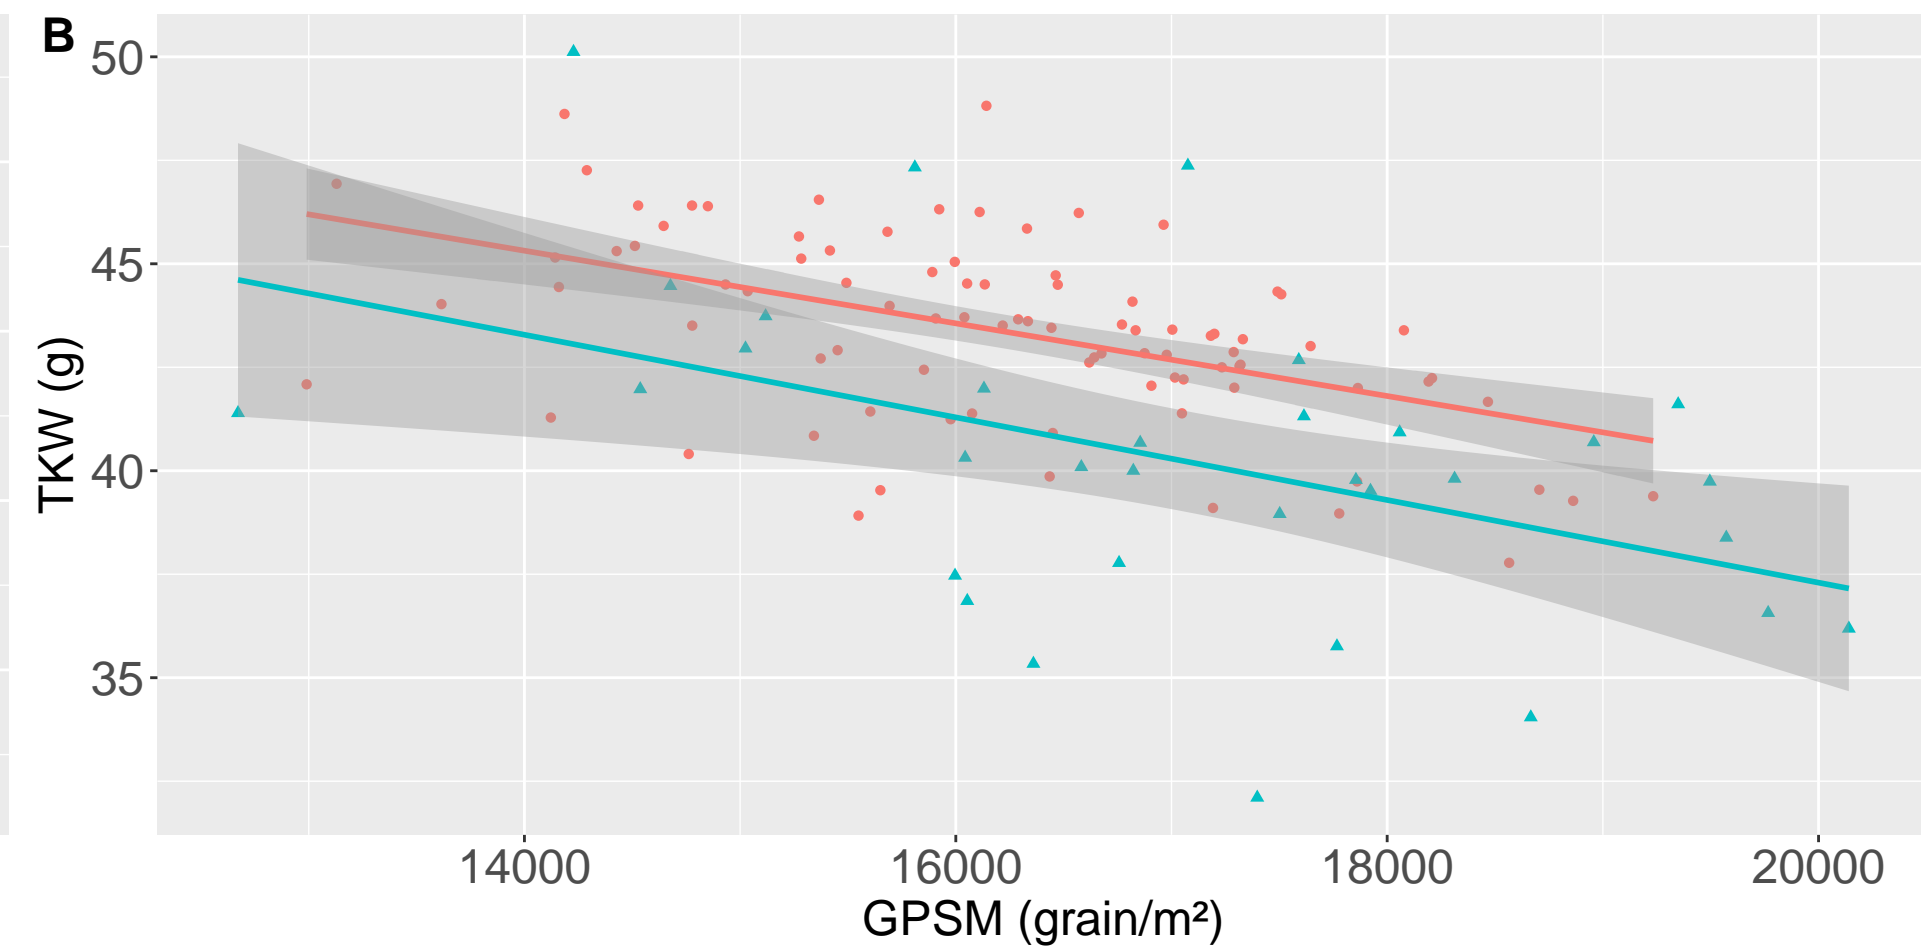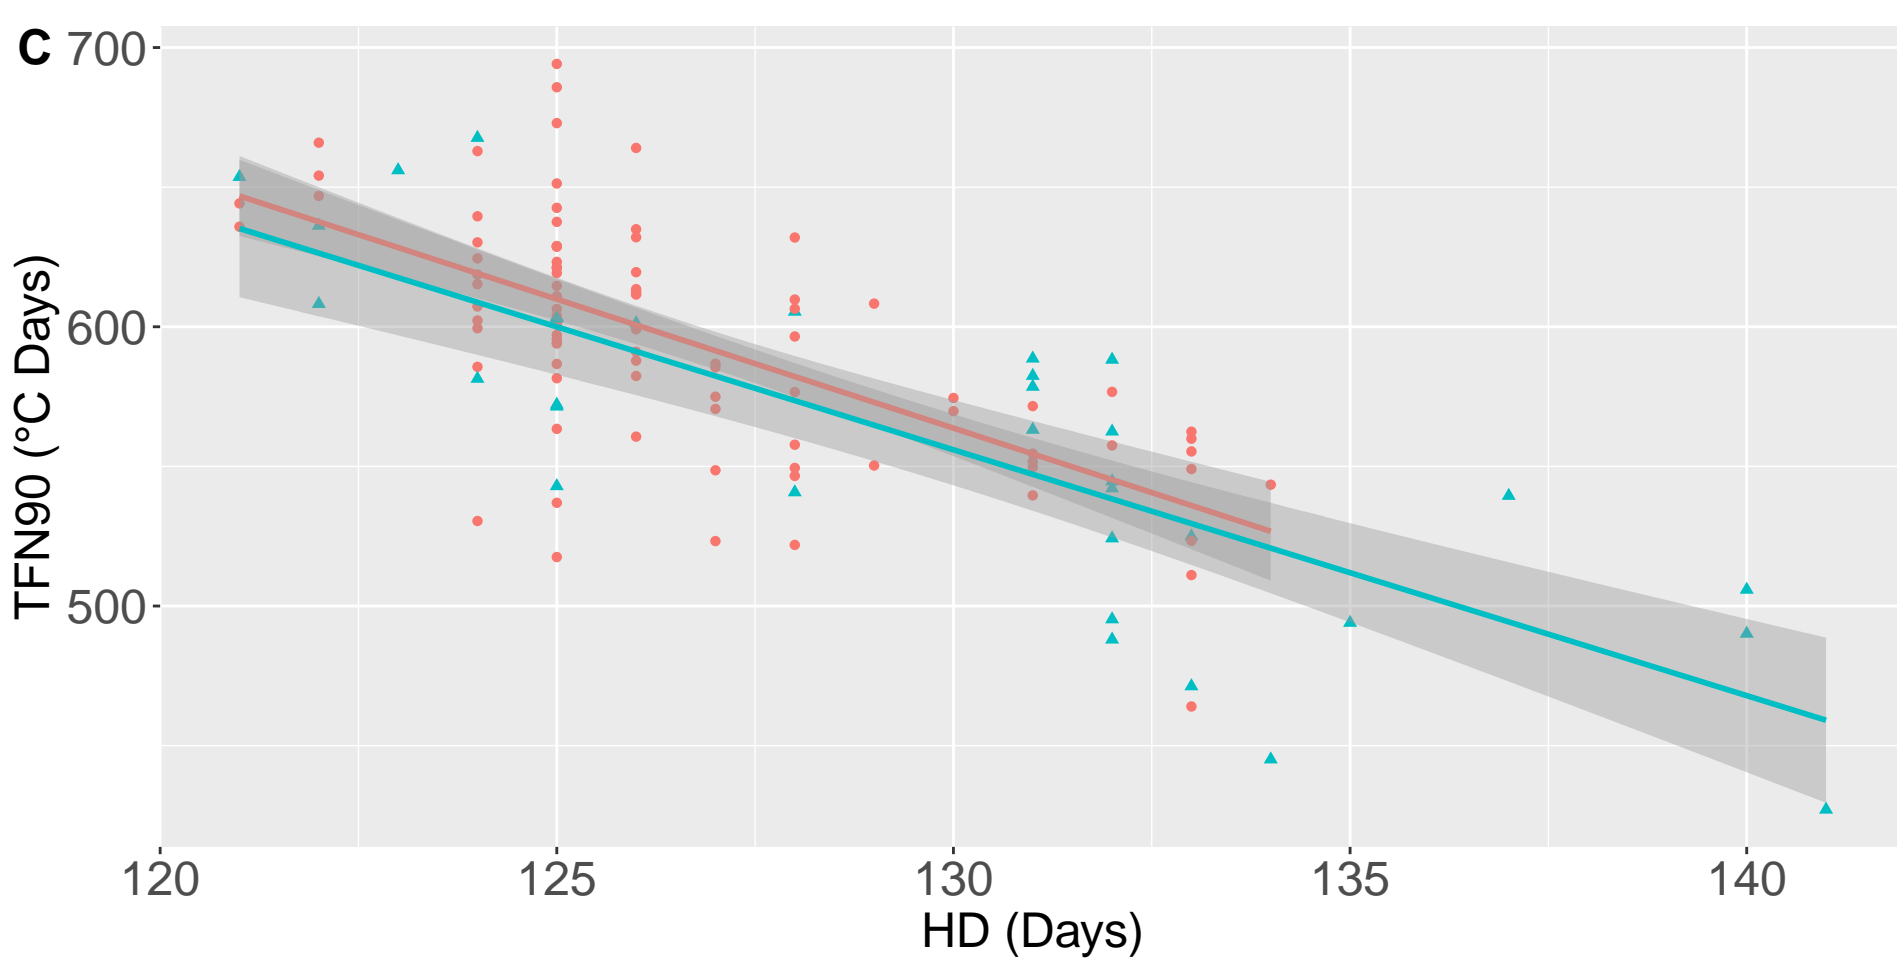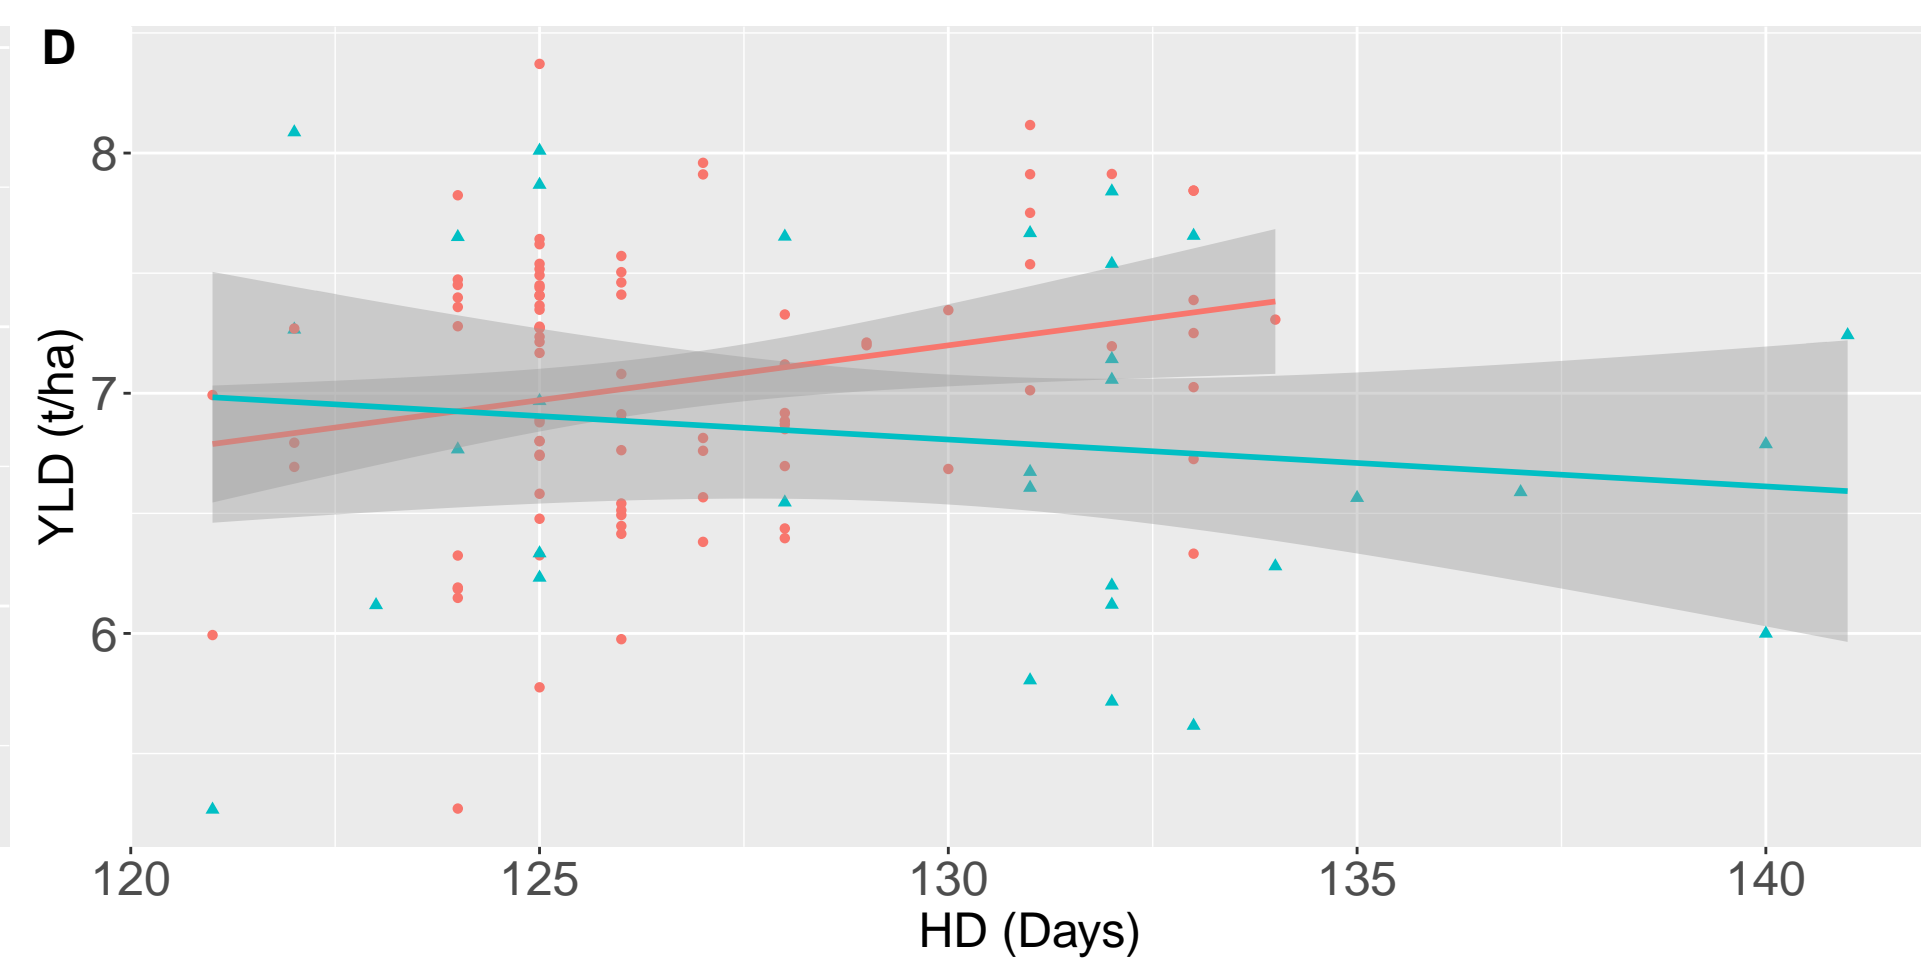

Supplement: s1 [file s1]

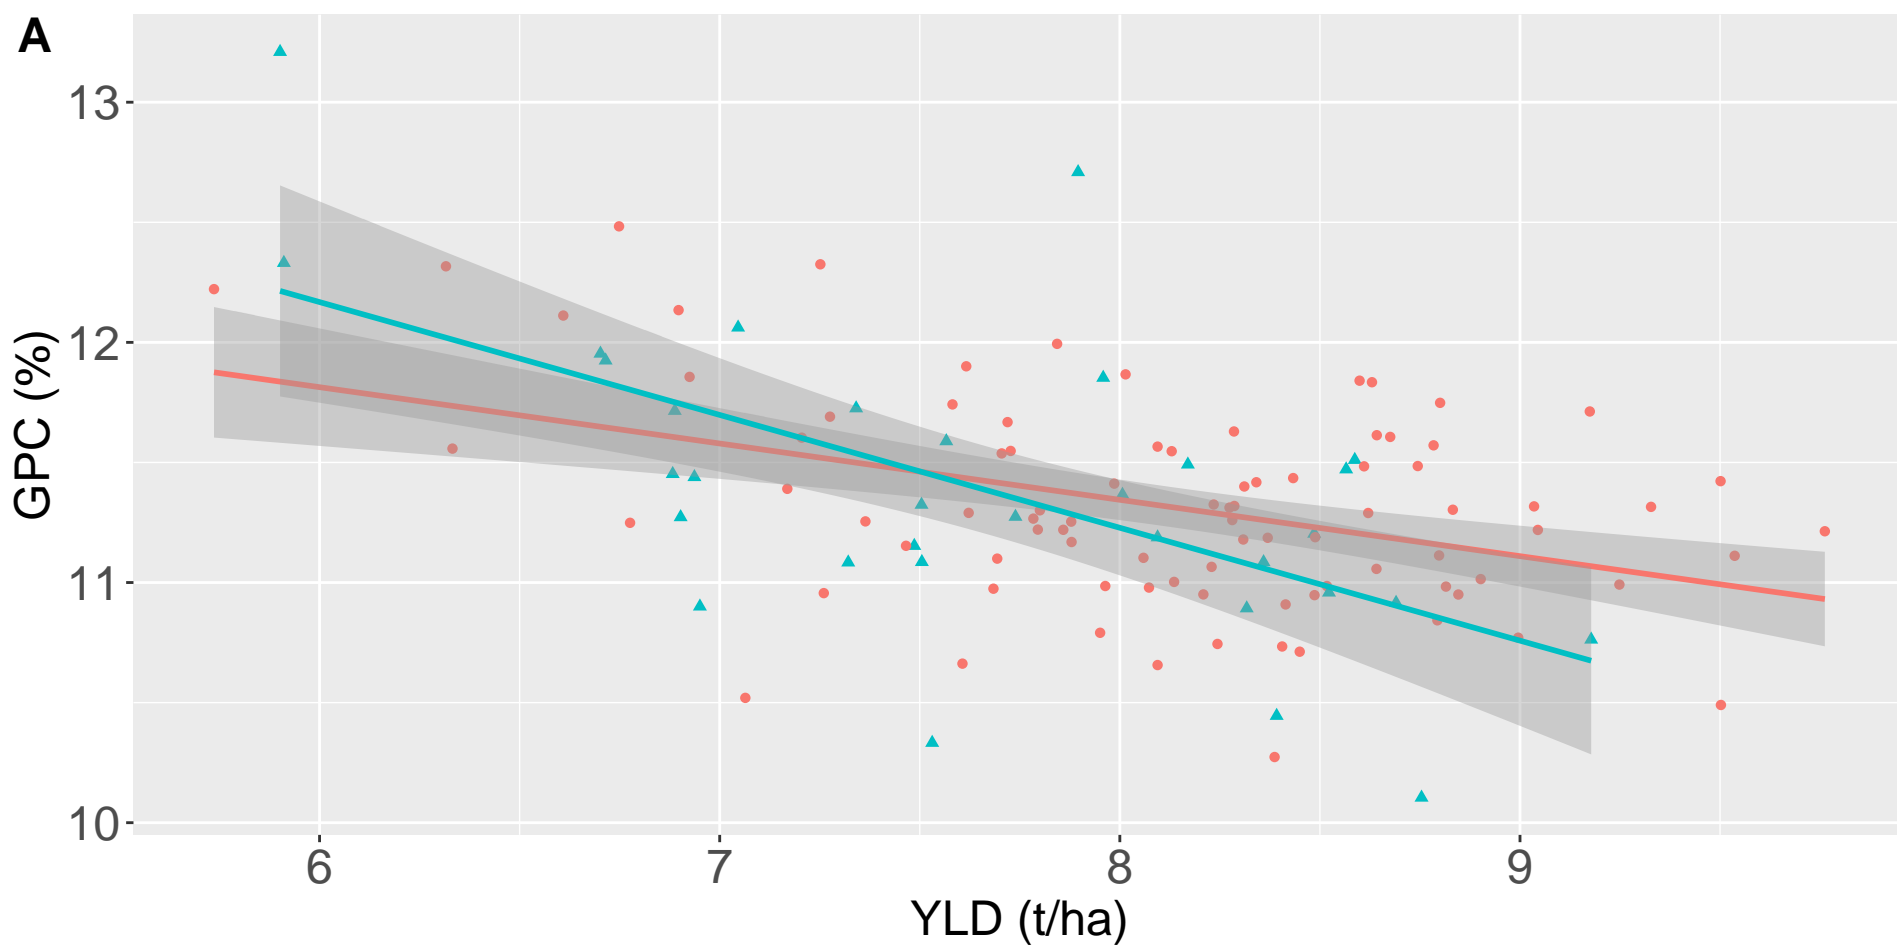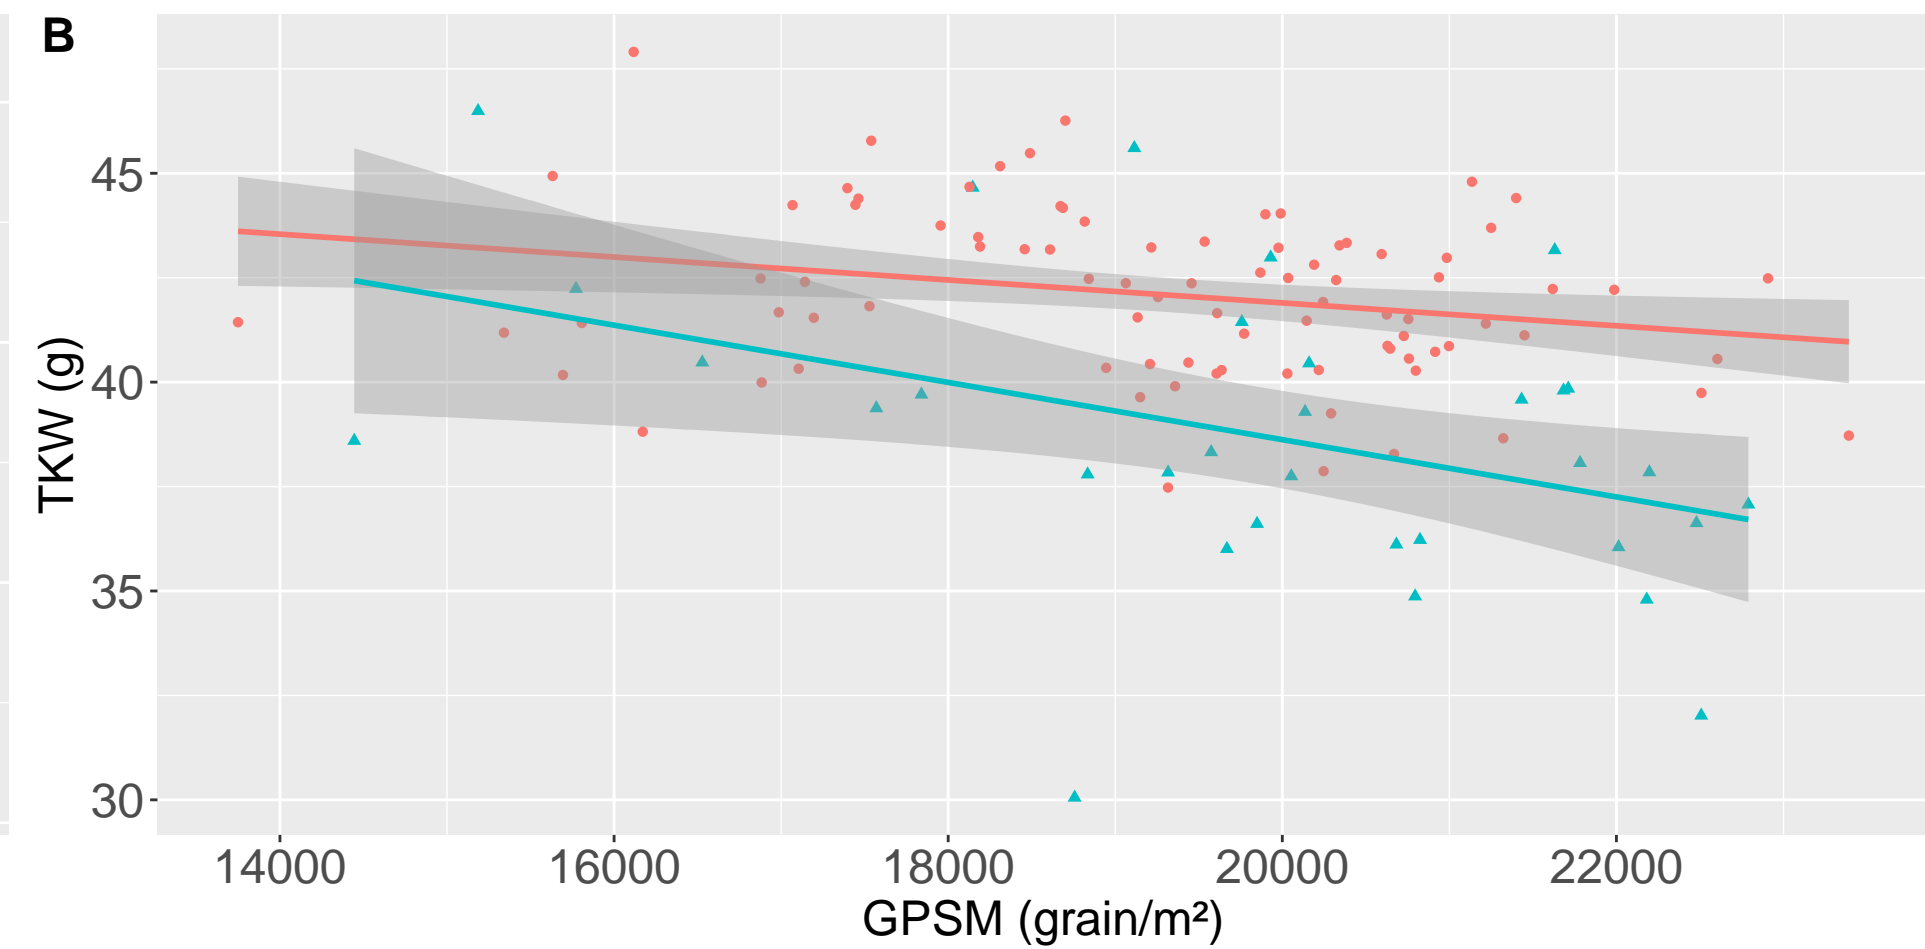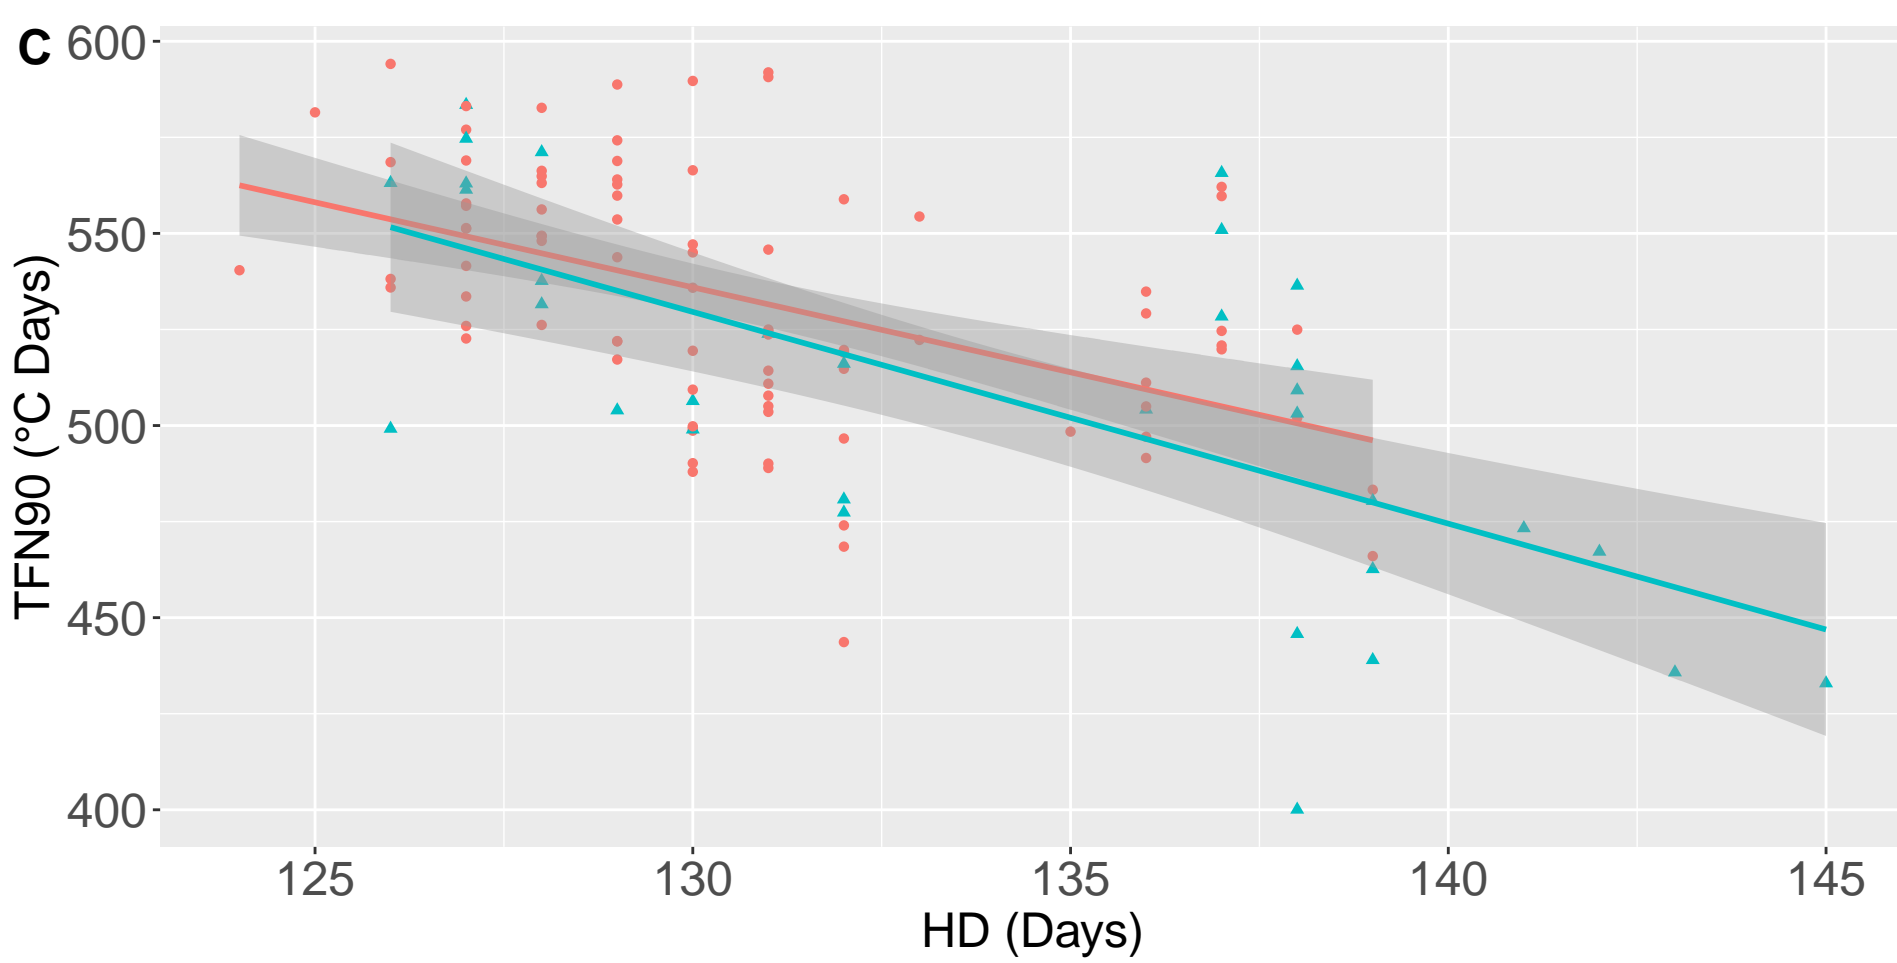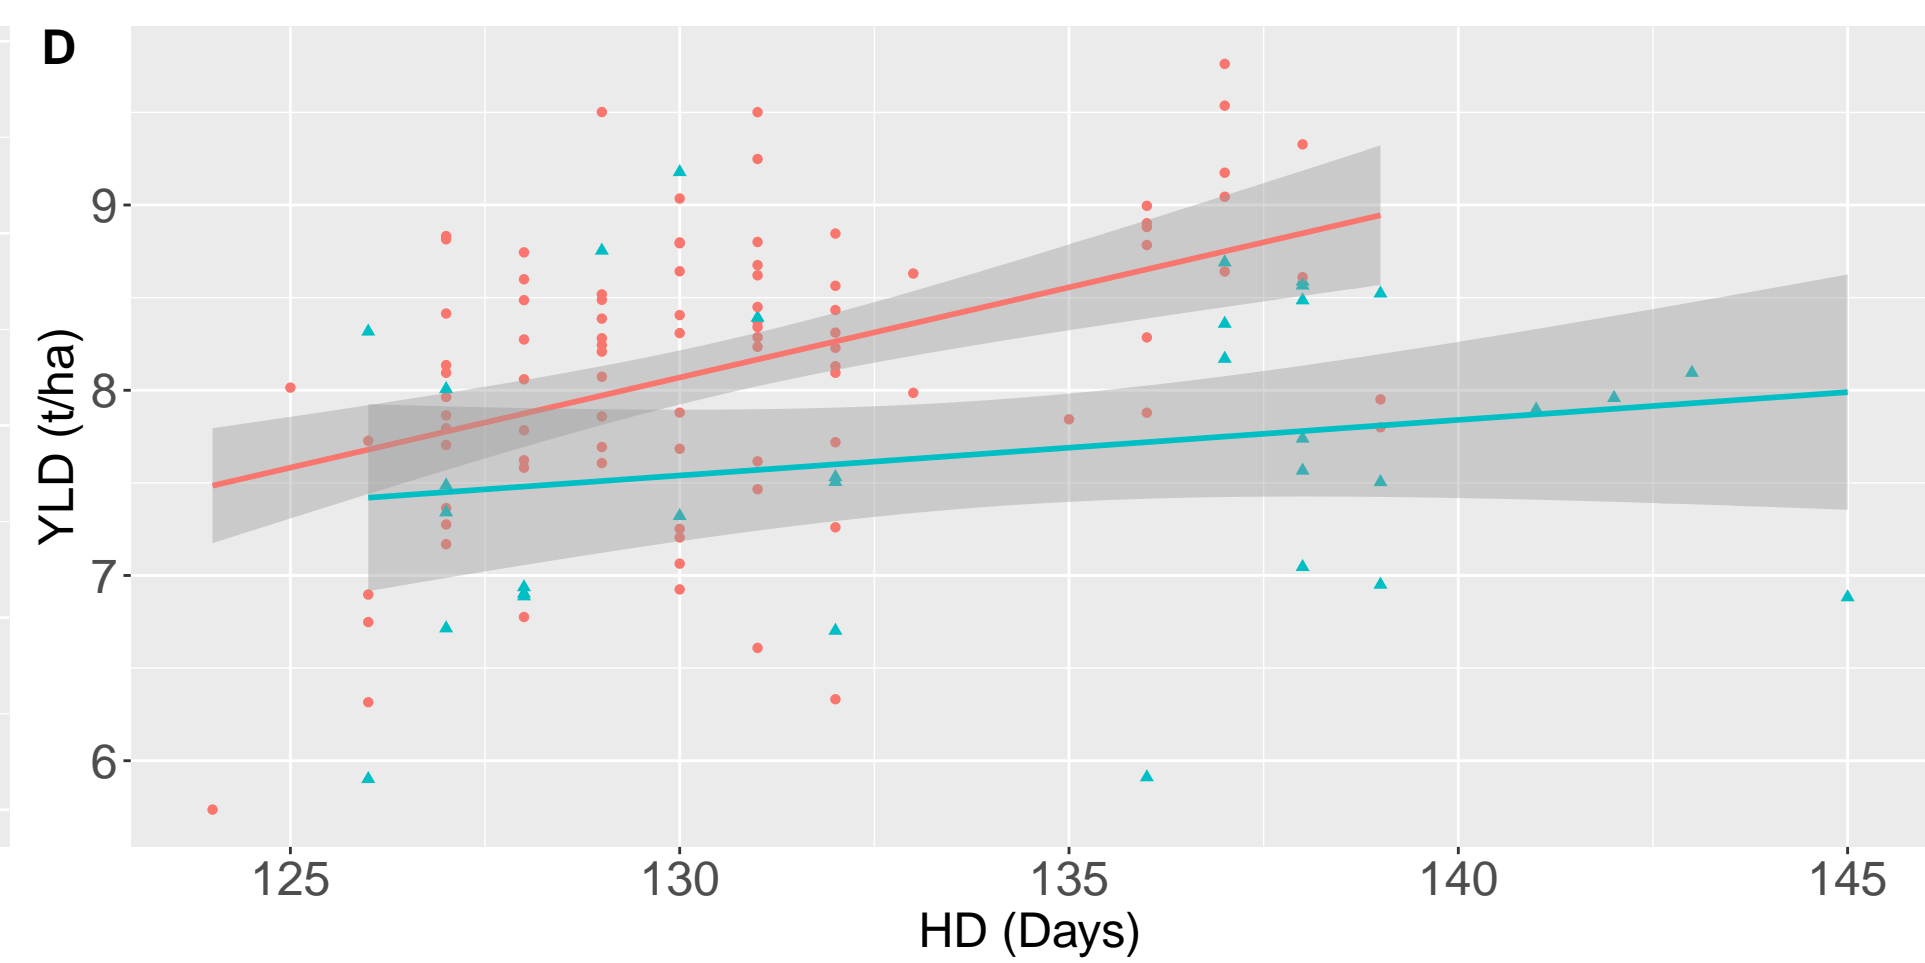

Supplement: s1 [file s1]

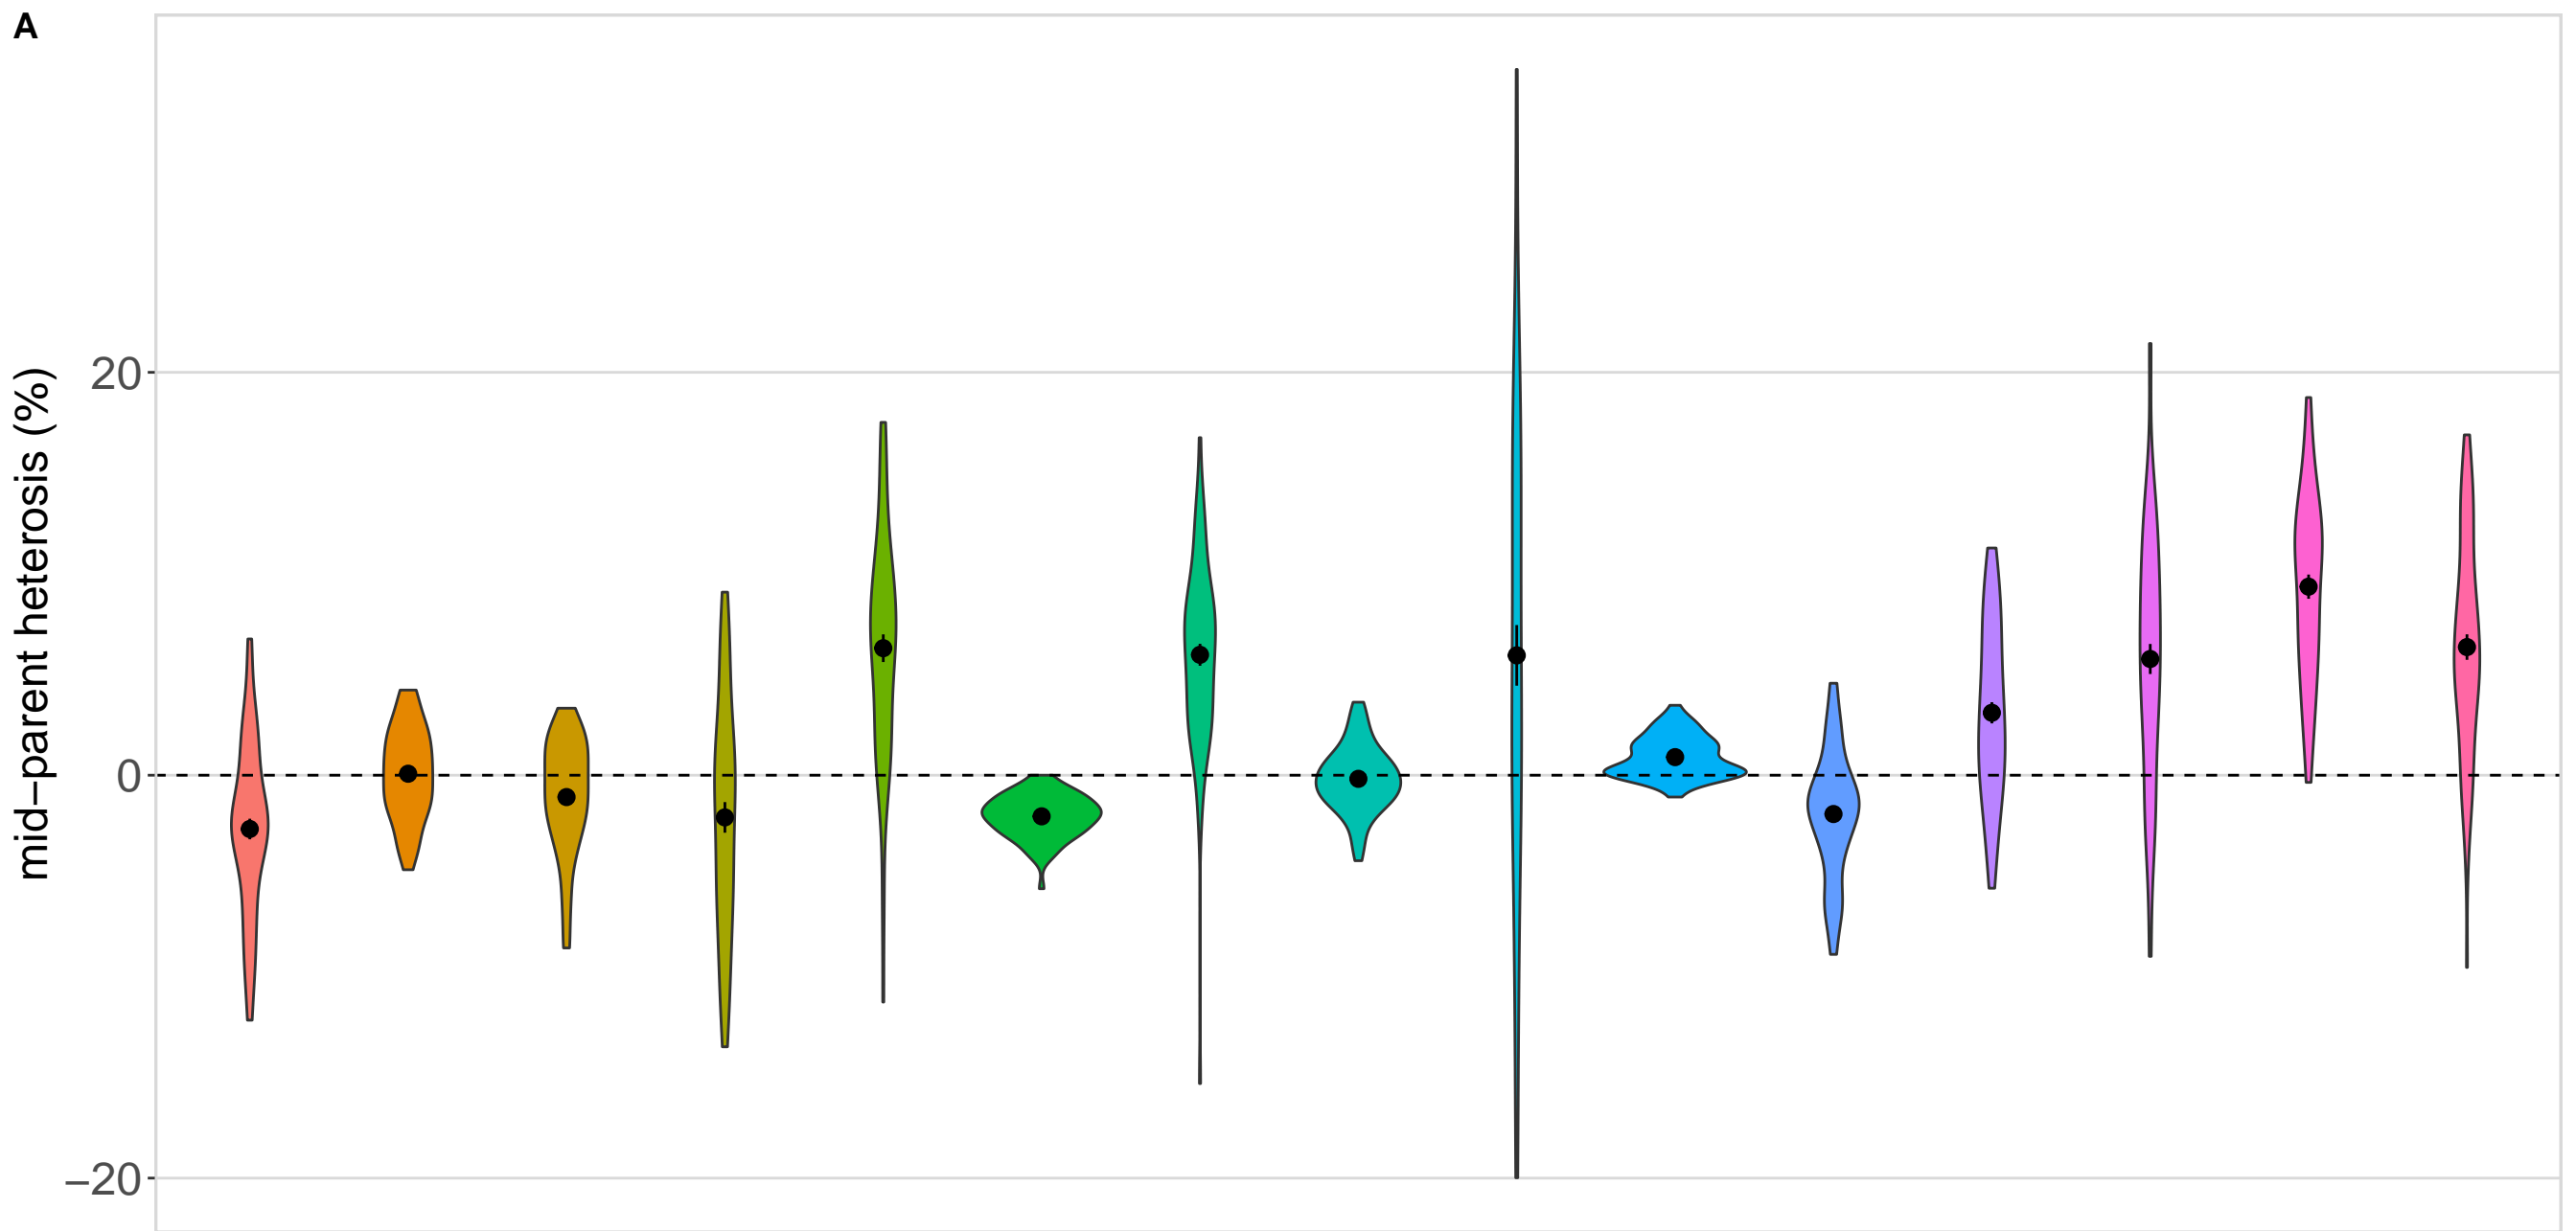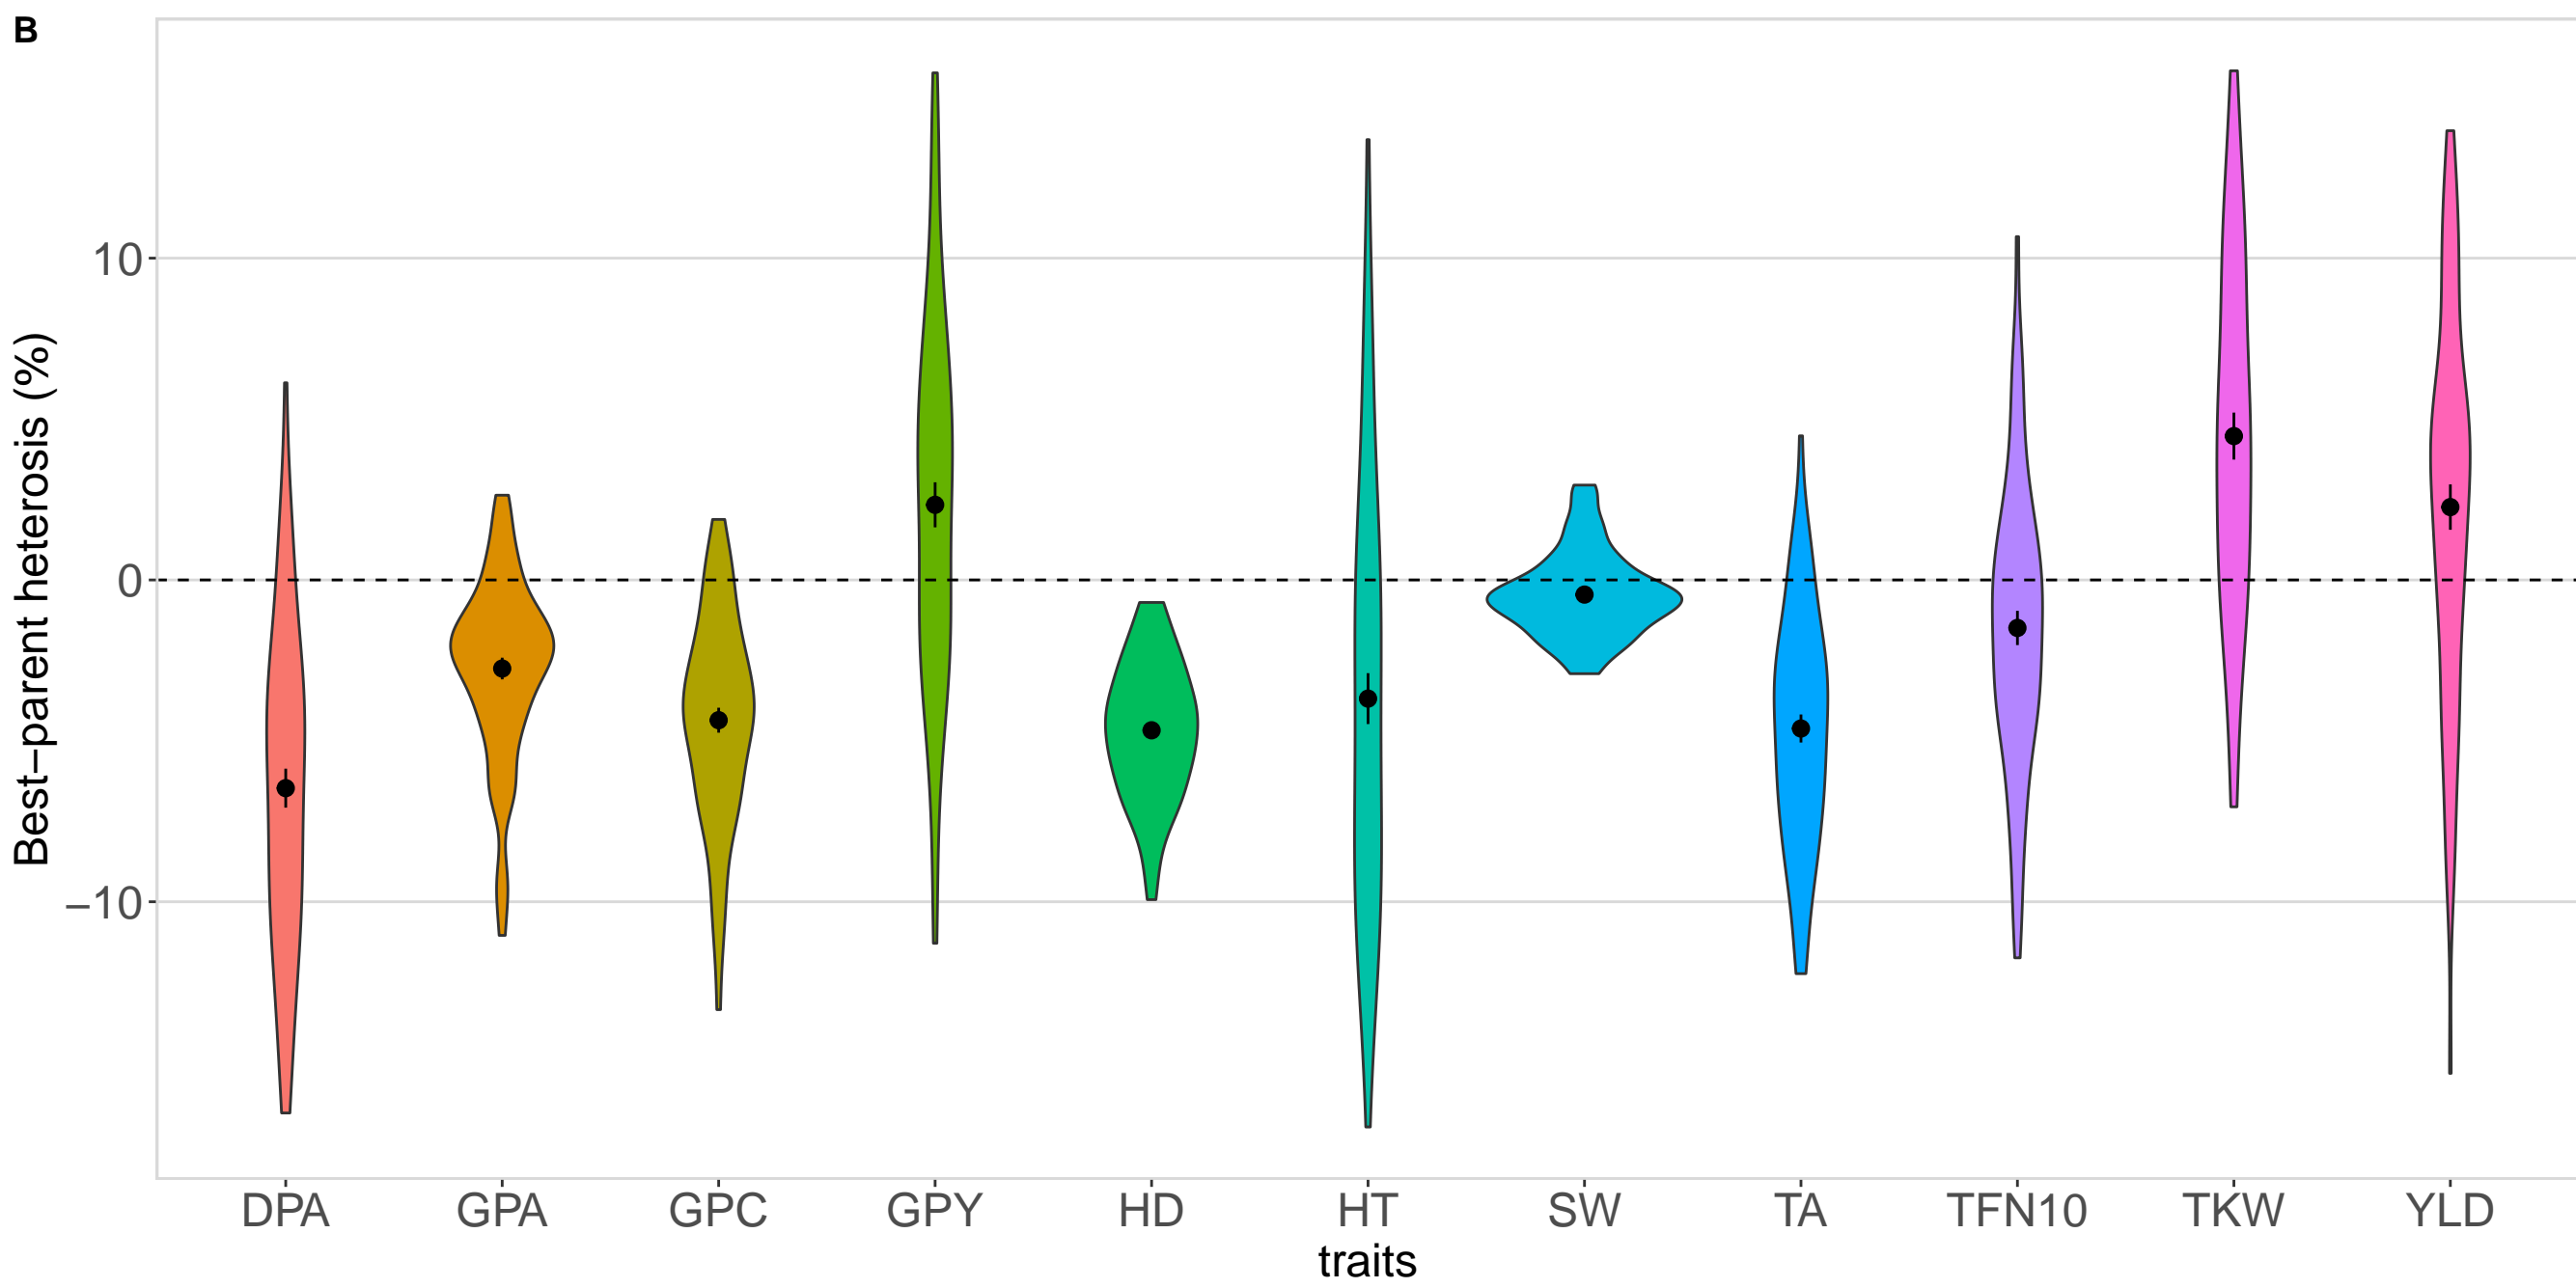

Supplement: s1 [file s1]

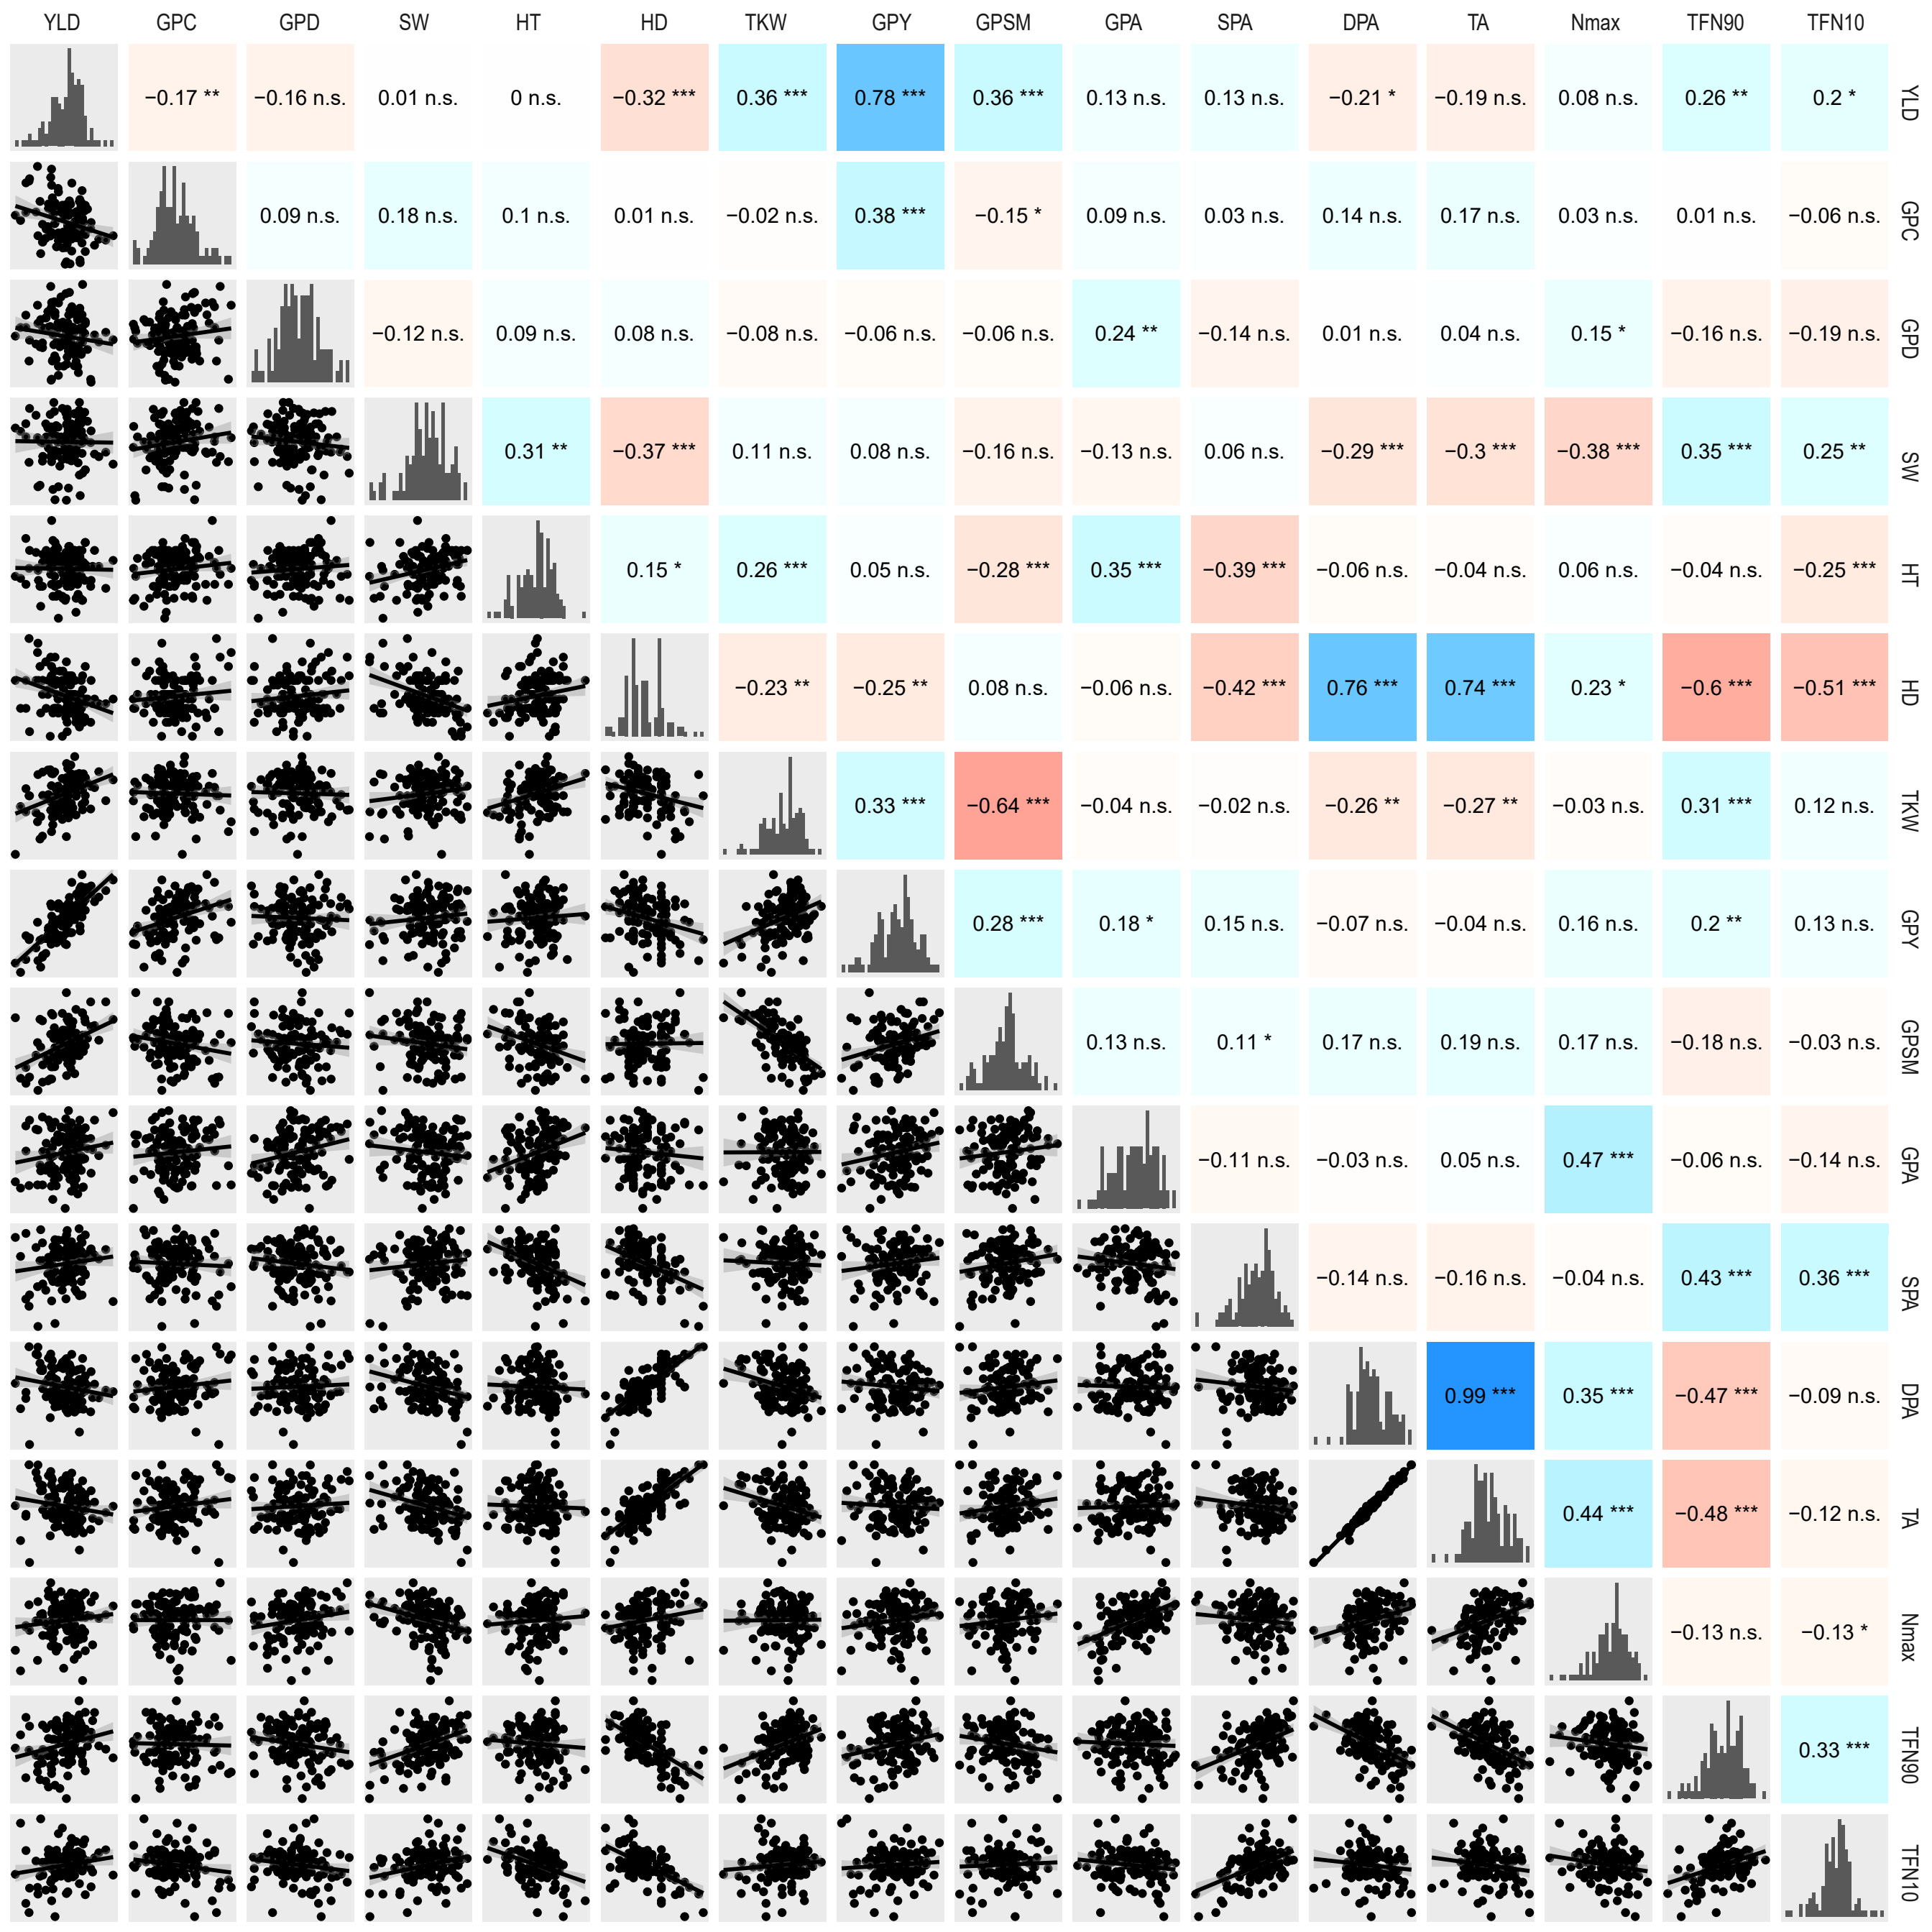

Supplement: s1 [file s1]
